# Supplementary material for: Exploring a Scalable Route for Efficient Flexible Perovskite Solar Cells via Amphiphilic Cross-linkable Monomer
Source: Royal Society of Chemistry journal article supplement (doi:10.1039/d5ee07050c), 2026-01-01
Supplement: d5ee07050c1.pdf [file d5ee07050c1.pdf]

## Supporting Information

### Exploring a Scalable Route for Efficient Flexible Perovskite Solar Cells via Amphiphilic Cross-linkable Monomer

*Chenfan Xing<sup>1,2†</sup>, Weifu Zhang<sup>3†</sup>, Hengyu Zhou<sup>2†</sup>, Jiahan Xie<sup>2</sup>, Shuaizhen Huang<sup>2</sup>, Simeng Gao<sup>2</sup>, Leixi He<sup>2</sup>, Zhongqiang Wang<sup>1,4\*</sup>, Lin Xie<sup>5\*</sup>, Mengjin Yang<sup>2</sup>, Wei Song<sup>2\*</sup>, Ziyi Ge<sup>2\*</sup>*

<sup>1</sup> College of Physics and Optoelectronics, Ministry of Education Key Laboratory of Interface Science and Engineering in Advanced Materials, Taiyuan University of Technology, Taiyuan 030024, China

<sup>2</sup> Zhejiang Provincial Engineering Research Center of Energy Optoelectronic Materials and Devices, Ningbo Institute of Materials Technology & Engineering, Chinese Academy of Sciences, Ningbo 315201, China.

<sup>3</sup> CAS Key Laboratory of Green Printing, Institute of Chemistry, Chinese Academy of Sciences Beijing 100190, China.

<sup>4</sup> School of Integrated Circuits, Ludong University, Yantai, 264025, China.

<sup>5</sup> School of Physical Science and Technology and School of Resources, Environments and Materials, Guangxi University, Nanning, Guangxi 530004, China.

\* Corresponding authors.

E-mail: [wangzhongqiang@tyut.edu.cn](mailto:wangzhongqiang@tyut.edu.cn); [20250153@gxu.edu.cn](mailto:20250153@gxu.edu.cn); [songwei@nimte.ac.cn](mailto:songwei@nimte.ac.cn); [geziyi@nimte.ac.cn](mailto:geziyi@nimte.ac.cn)

† These authors contributed equally to this work.

## Experimental Sections

### 1. Materials

**Solvents:** N, N-dimethyl formamide (DMF, anhydrous,  $\geq 99.8\%$ ), Dimethyl sulfoxide (DMSO, anhydrous,  $\geq 99.9\%$ ) were purchased from Sigma-Aldrich (USA). Diethyl ether (DE, anhydrous, 99.7%), Absolute ethanol (General-Reagent, 99.7%), Acetone (99.5%) and isopropanol (IPA, 99.7%) were purchased from Sinopharm Chemical Reagent Co., Ltd (China).

**Reagents:** (4-(7H-dibenzo[c,g]carbazol-7-yl)butyl)phosphonic acid (4PADCB,  $\geq 99.8\%$ ), Fullerene C60 (C60,  $\geq 99.5\%$ ), Bathocuproine (BCP,  $\geq 99.5\%$ ) were purchased from Shanghai Daeyon Chemical Corp (China). Patterned Glass/ITO substrate, Cesium iodide (CsI, 99.99%), Formamidinium iodide (FAI, 99.9%), Methylammonium bromide (MABr, 99.99%), Lead(II) iodide (PbI<sub>2</sub>, 99.99%), Lead bromide (PbBr<sub>2</sub>, 99.99%) and methylammonium chloride (MACl, 99.9%) were purchased from Advanced Election Technology Corp (China). The key feedstock 5-(1,2-dithiolan-3-yl)pentanamide(TAN) and 1-{2-[(E)-[4-(dihydroxyboranyl)phenyl]methylidene]diazanyl}-5-(1,2-dithiolan-3-yl)pentan-1-one(TBA) were purchased from Zhengzhou Alfa Chemical Co., Ltd. with a purity of 97%.

All the chemicals and reagents were purchased and used directly without any further purification

### 2. Solution Preparation

The 1.62 M perovskite precursor solution with the composition of Cs<sub>0.05</sub>(FA<sub>0.98</sub>MA<sub>0.02</sub>)<sub>0.95</sub>(I<sub>0.95</sub>Br<sub>0.05</sub>)<sub>3</sub> was prepared by fully dissolving FAI, MABr, CsI, PbI<sub>2</sub>, PbBr<sub>2</sub> in a mixed solvent of DMF and DMSO with a volume ratio of 4:1. Moreover, for the precursor solution with CL(TAN) and CL(TBA), 0.3 mg of TAN and TBA was introduced into the perovskite precursor solution, respectively. Then, the perovskite precursor solution was stirred at room temperature for 6 hours..

### 3. Device fabrication

Firstly, the patterned glass/indium tin oxide (ITO) substrates were washed with detergent, deionized water, acetone, and isopropanol in sequence for 20 minutes. After that, the cleaned substrates were dried by nitrogen (N<sub>2</sub>) flow and then treated with oxygen plasma for 5 minutes. The prepared devices with a architecture of Glass /ITO/4PADCB/PVK/C60/ BCP/Ag. In terms of the preparation of rigid device, 100 ul 4PADCB (0.8mg/ml) dissolved in absolute ethanol was spin coated on ITO for 30 s at 3000 rpm, and then annealed at 120 °C for 10 minutes.

Subsequently, 50  $\mu$ l perovskite precursor solution was deposited on 4PADCB-based substrate at 4000 rpm for 30 s, 600  $\mu$ l DE as the antisolvent was added dropwise onto the center of substrate at 15 s before the end of spin-coating. The as-prepared perovskite films were immediately transferred to hotplate and annealed at 100 °C for 30 min. For the devices with post-treatment, 100  $\mu$ l of PI (1.0 mg/ml) dissolved in IPA was spin-coated on the perovskite surface at 5000 rpm for 25 s, followed by annealing at 100 °C for 5 minutes. The aforementioned spin-coated processes were all conducted at room temperature (25-30 °C) in a N<sub>2</sub>-filled glove box with the contents of O<sub>2</sub> and H<sub>2</sub>O < 0.01 ppm. Finally, 25 nm of C60 at a rate of 0.2 Å/s, 10 nm of BCP at a rate of 0.2 Å/s, and 100 nm of silver (Ag) electrode at a rate of 2.0 Å/s were thermally evaporated, respectively, under high vacuum ( $<1 \times 10^{-4}$  pa).

#### **4. Modules-fabrication process**

For the fabrication of perovskite solar modules (PSMs), the primary difference compared to small-area device fabrication is that the modules involve additional scribing steps to divide a large-area device into small-area subcells and form electrical interconnections between them. The scribing scheme includes three basic steps (known as P1, P2 and P3 scribing). The P1 pattern is etched on glass/ITO substrates by laser, a femtosecond infrared laser (1030nm, 400fs, 0.5MHz, scribing speed 2000mm/s, average power 10.063W), and then the substrates are cleaned using the aforementioned methods. The 4PADCB/PVK/C60/BCP layers are subsequently deposited on the substrates. In terms of the preparation of rigid device, 300  $\mu$ l 4PADCB (0.8mg/ml) dissolved in absolute ethanol was spin coated on ITO for 30 s at 4000 rpm, and then annealed at 120 °C for 10 minutes. Subsequently, 150  $\mu$ l perovskite precursor solution was deposited on 4PADCB-based substrate at 5000 rpm for 30 s, 3000  $\mu$ l DE as the antisolvent was added dropwise onto the center of substrate at 15 s before the end of spin-coating. The as-prepared perovskite films were immediately transferred to hotplate and annealed at 100 °C for 30 min. For the devices with post-treatment, 300  $\mu$ l of PI (1.0 mg/ml) dissolved in IPA was spin-coated on the perovskite surface at 6000 rpm for 25 s, followed by annealing at 100 °C for 5 minutes. The P2 scribing step removes the BCP/C60/PVK/4PADCB layers, exposing the ITO within the P2 pattern lines (1030nm, 400fs, 0.5MHz, scribing speed 2000mm/s, average power 3.123W). Afterward, 100 nm of Ag was deposited by thermal evaporation, covering the top of ETL and filling the P2 channels. Finally, the P3 scribing step is conducted to isolate the Ag electrode between neighbouring subcells, using the same laser with 4.858W average power and scribing speed 3000mm/s, completing the monolithic interconnections.

## 5. Characterizations of films

The Fourier transform infrared (FTIR) spectroscopy was detected by FTIR8400S (Shimadzu). The X-ray photoelectron spectroscopy (XPS) experiments were recorded on a monochromatic Al-K $\alpha$  (1486.6 eV) as the radiation source (Shimadzu, Axis Supra). The Scanning Electron Microscope (SEM) (verios G4 UC) (Rimono Scientific Company, America) was performed at 2kV to obtain the top-view and cross-sectional SEM images of perovskite films. X-Ray diffraction (XRD) measurements were performed using a D/MAX Ultima III XRD spectrometer (Rigaku) with a Cu K $\alpha$  line of  $\lambda = 1.5410 \text{ \AA}$ . Grazing incident wide-angle X-ray scattering (GIWAXS) measurements were performed by the XEUSS SAXS/WAXS equipment, at an incident angle of  $0.5^\circ$ . The Atomic Force Microscopy (AFM) images, Kelvin Probe Force Microscopy (KPFM) images and the peak force quantitative nanomechanical atomic force microscopy (PFQNM-AFM) were captured by Bruker Dimension ICON SPM, America. The energy level was obtained by ultra-violet photoelectron spectroscopy (UPS) (R3000, Scienta) using HeI (21.2 eV) as the excitation source and ultraviolet-visible absorption spectra (UV-vis) (Lambda 950). The steady photoluminescence (PL) spectra were obtained from the Horiba jobin Yvon fluorolog-3 spectrofluorometer system with incident light at 405nm and the time-resolved photoluminescence (TRPL) was analyzed by the FLS 980 fluorescence spectrometer equipped with a 475 nm excitation. PL mapping was measured by LEICA TCS SP5.

## 6. Characterizations of devices

The photovoltaic performance of the device was measured under simulated solar lamp (100 mW/cm<sup>2</sup>, AM1.5 G) provided by Newport oriel sol3A 450 W solar simulator. The J-V curves of devices were measured at room temperature. The light source parameters are 450 W xenon lamp (oriel solar simulator), calibrated to 100 mW/cm<sup>2</sup> by silicon reference cell. The effective area is 0.06 cm<sup>2</sup>, defined with a non-reflective mask. The scanning parameters were forward scanning (-0.2 to 1.2 V, step 0.02 V, scan rate : 0.1 V/s dwell time 50 ms) and reverse scanning (from 1.2 to -0.2 V, step 0.02 V, scan rate : 0.1 V/s dwell time 50 ms). The stabilized power output (SPO) and steady-state current density curves of the devices were measured by detecting the photocurrent density output with the biased voltage set at the MPP. The dependence of  $V_{oc}/J_{sc}$  on light intensity were measured by varying the light intensity. The solar cell quantum efficiency test system (Elli Technology Taiwan) was used to measure the EQE spectra of devices with a wavelength range of 300~1100 nm. The capacitance versus frequency (C-F) curves were recorded by the 1240A Impedance Analyzer. The Mott-Schottky curves and the impedance spectroscopy (IS) were determined with the Chenhua CHI760E electrochemical

workstation. EQE<sub>EL</sub> measurements were measured by applying external voltage/current sources through the PSCs with a REPS measurement instrument (Enlitech). The operational stability of the devices was also examined by monitoring the maximum power point (MPP) tracking under 1 sun illumination in an N<sub>2</sub> environment (~25 °C and ~30% RH).

## 7. Theoretical simulation

The Density Functional Theory (DFT) calculations in this work are performed using the Vienna ab initio simulation software (VASP). The exchange-functional was treated using the Perdew-Burke-Ernzerhof (PBE) functional, in combination with the DFT-D3 correction. Cut-off energy of the plane-wave basis was set as 450 eV. For optimization of lattice size of FAPbI<sub>3</sub> cubic cell, the Brillouin Zone integration was performed with a Monkhorst-Pack k-point sampling of 4×4×4. For optimization of geometry of slab models, the Brillouin Zone integration was performed with a Gamma k-point sampling of 1×1×1. The self-consistent calculations applied a convergence energy threshold of 10<sup>-5</sup> eV. After completing the structural optimization calculation, the adsorption energies ( $E_{ads}$ ) and formation energies ( $E_f$ ) of defects were calculated by the equation as follows:

$$E_{ads} = E(AB) - E(A) - E(B).$$

Where,  $E(AB)$  represents the total energy of slab model with TBA or TAN adsorbed on surface.  $E(A)$  represents the total energy of clean surface of slab model.  $E(B)$  represents the total energy of TAN or TBA molecule in its gas phase.

$$E_f = E(C) + E(S)/n - E(D).$$

Here,  $E(C)$  represents the total energy of slab model with vacancy on surface.  $E(D)$  represents the total energy of slab model with no vacancy on surface.  $E(S)$  represents the total energy of stable element. n represents the total number of atoms of stable element. In the case of  $E_f$  of I vacancy,  $E(S) = 0.5 * E(I_2)$ . In the case of  $E_f$  of Pb vacancy,  $E(S) = 0.25 * E(Pb_4)$ . In the case of  $E_f$  of FA vacancy,  $E(S) = 0.25 * E(graphite(C_4)) + 2.5 * E(H_2) + E(N_2)$ . I<sub>2</sub>, Pb<sub>4</sub>, graphite(C<sub>4</sub>), H<sub>2</sub> and N<sub>2</sub> are stable elements.

## 8. Calculation Methods

### Note 1: Carrier recombination lifetime and exciton lifetime calculation

The carrier recombination lifetimes can be derived from time-resolved photoluminescence (TRPL), the TRPL decay curves were fitted by the bi-exponential function:

$$y(t) = A_1 \exp^{\frac{-t}{\tau_1}} + A_2 \exp^{\frac{-t}{\tau_2}} + y_0$$

$$\tau_{ave} = \frac{\sum A_i \tau_i^2}{\sum A_i \tau_i}$$

where,  $A_1$  and  $A_2$  are the relative amplitudes,  $\tau_1$  and  $\tau_2$  represent time constants for fast and slow decay lifetimes in relation to nonradiative recombination of surface traps near the GBs and radiative recombination from the bulk perovskite film, respectively.

**Note 2: Analyzation of space-charge-limited current (SCLC) model**

The dark  $J$ - $V$  curves display three typical regions: (I) the Ohmic region at low bias region, (II) the trap-filled limited region at intermediate bias region, and (III) a trap-free SCLC region at high bias region. In the trap-filled limited region, the trap density levels are continuously filled as bias increases, and all of traps are filled until the trap-filled limit voltage ( $V_{TFL}$ ). The trap density is estimated according to the equation:

$$N_t = \frac{2\epsilon\epsilon_0 V_{TFL}}{qL^2}$$

Where  $N_t$  is the trap density,  $\epsilon$  is the dielectric constants of perovskite,  $\epsilon_0$  is the vacuum permittivity,  $L$  is the thickness of the perovskite film, and  $q$  the elementary charge.  $V_{TFL}$  is obtained by fitting the dark  $I$ - $V$  data with the equation.

**Note 3: The dependence of  $J_{sc}$  and  $V_{oc}$  of the PSCs on light intensity**

The ideality factor  $nKT/q$  can be calculated by equation:

$$V_{oc} = \frac{nKT}{q} \ln(P_{light})$$

The exponential factor  $\alpha$  can be calculated by equation:

$$\alpha = \frac{\ln(J_{sc})}{\ln(P_{light})}$$

**Note 4: Hysteresis index (HI)**

The  $J$ - $V$  hysteresis index (HI) is defined by the following equation:

$$HI = \frac{PCE_{Reverse} - PCE_{Forward}}{PCE_{Reverse}}$$

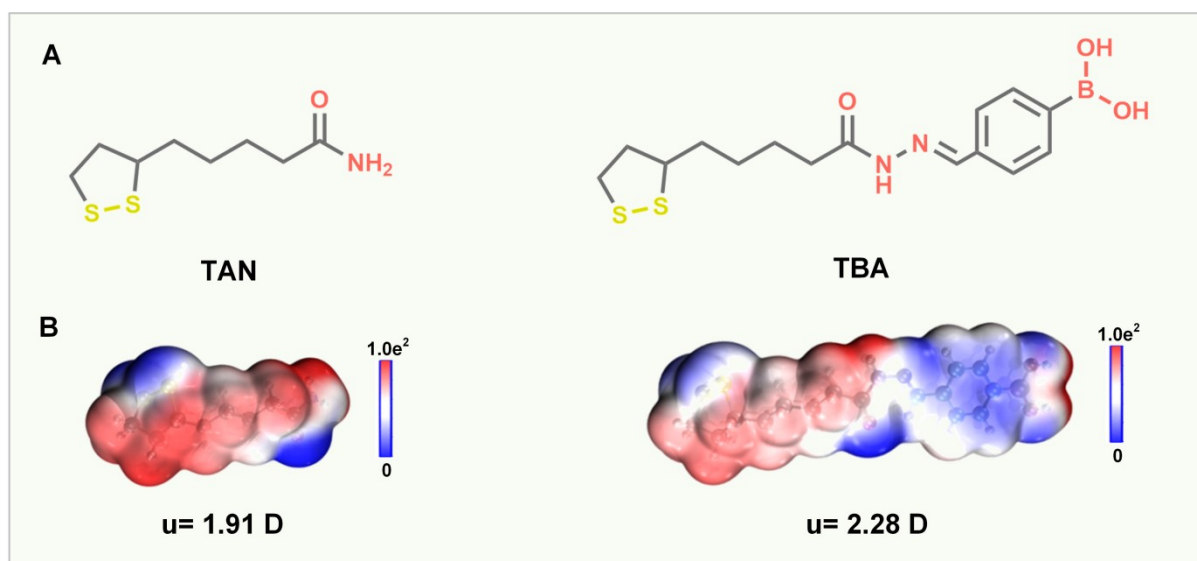

**Figure S1.** Molecule syructure (A) and calculated electrostatic potential (ESP) distributions (B) of TAN and TBA .

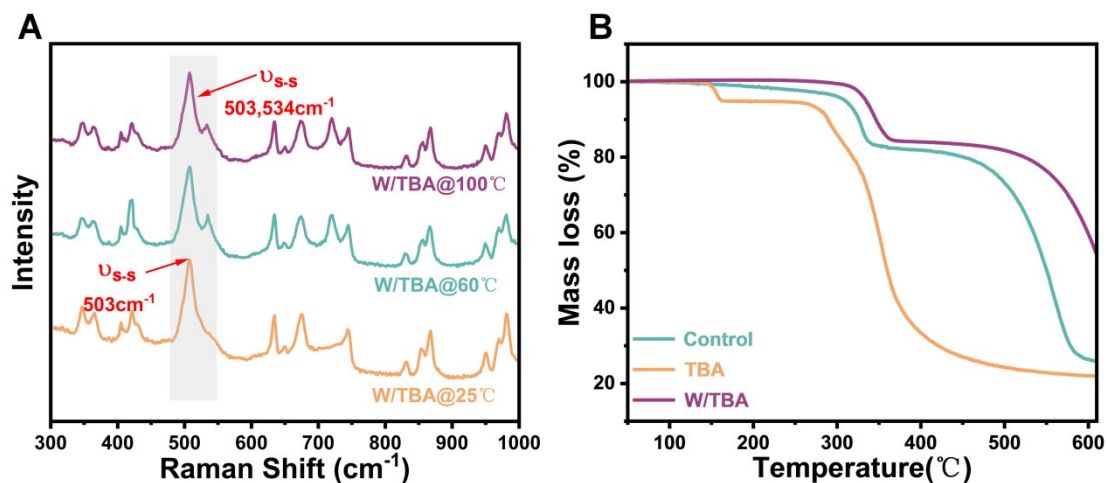

**Figure S2. Ring-opening polymerization process and thermal stability of TBA.** (A) Raman spectra of TBA heating at different temperatures. (B) TGA curves of the perovskite powder, TBA, and the perovskite powder containing TBA.



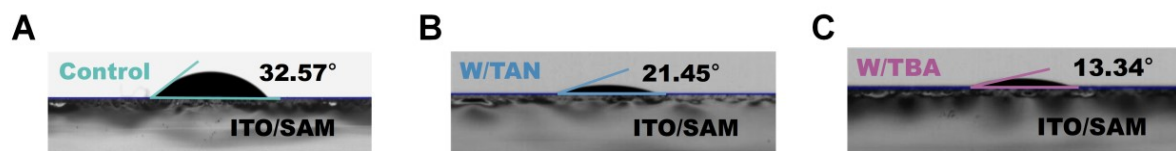

**Figure S3.** Contact angles of the perovskite precursor on the glass/ITO/SAM substrates.

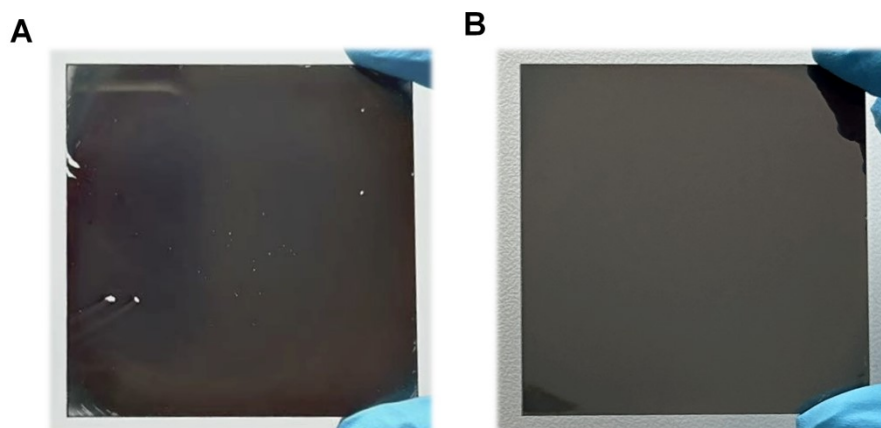

**Figure S4.** Photographic images of large-area perovskite films deposited on  $5\times 5\text{ cm}^2$  glass/ITO/SAMs substrates.

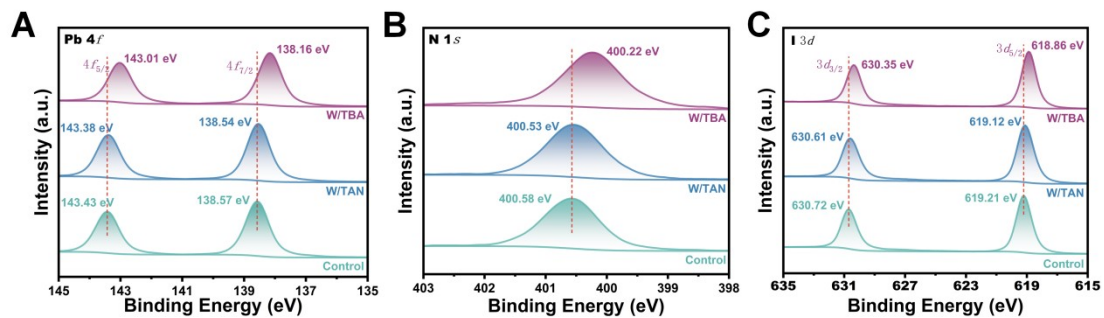

**Figure S5.** High-resolution XPS spectra of Pb 4f, N 1s, I 3d core levels for control, TAN- and TBA-modified perovskite films.

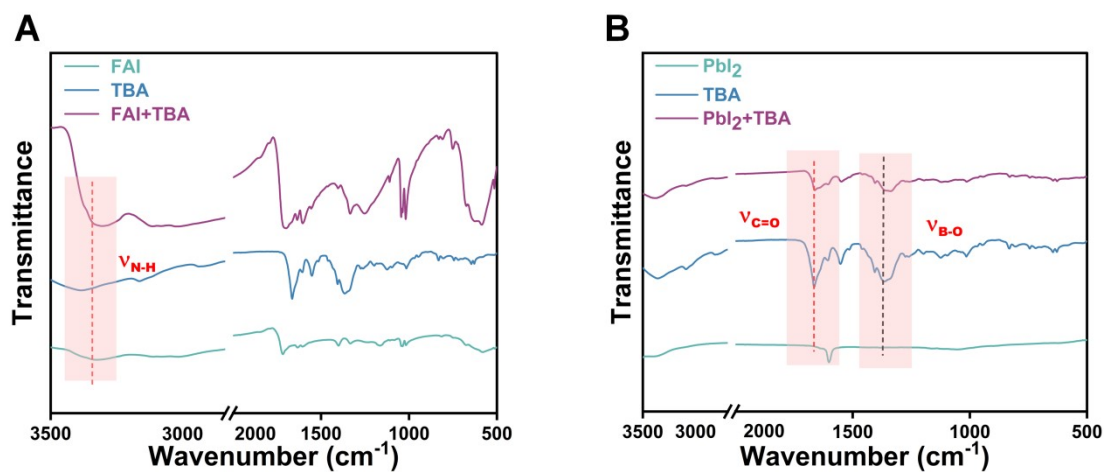

**Figure S6.** (A) FTIR spectra of pure PbI<sub>2</sub>, TBA molecules, TBA and PbI<sub>2</sub> mixed powder. (B) FTIR spectra of pure FAI, TBA molecules, FAI and TBA mixed powder.

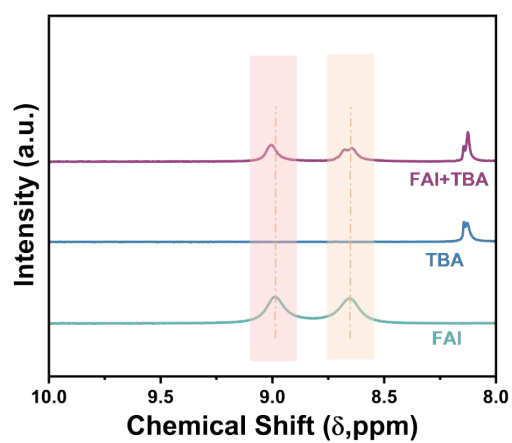

**Figure S7.** A comparison of <sup>1</sup>H NMR spectra of FAI, TBA, TBA+FAI in deuterated *d*<sub>6</sub>-DMSO.

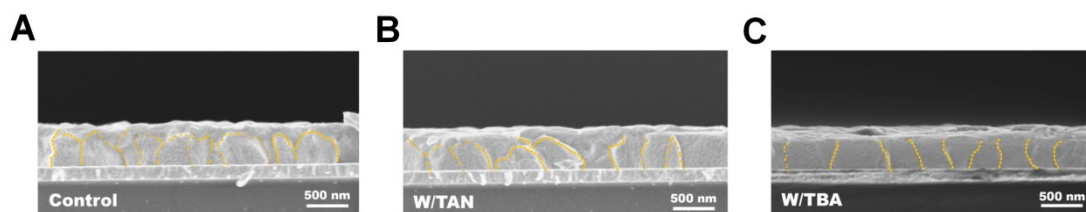

**Figure S8. Cross-sectional SEM images of the perovskite films.** (A) Control, (B) W/TAN modified perovskite film and (C) W/TBA-modified perovskite film.

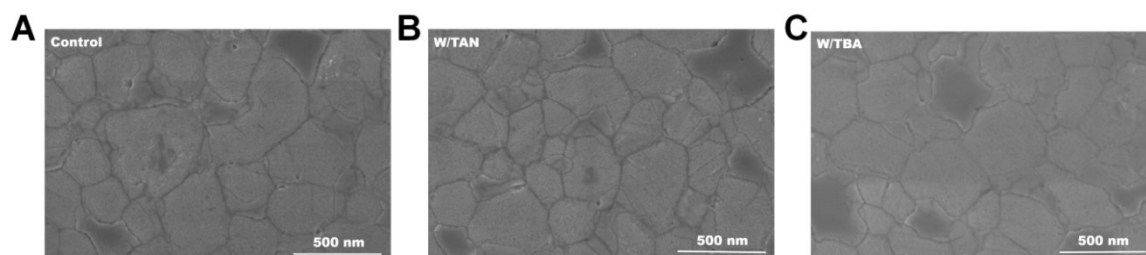

**Figure S9. SEM images of buried interface.** (A) Control, (B) W/TAN, and (C) W/TBA.

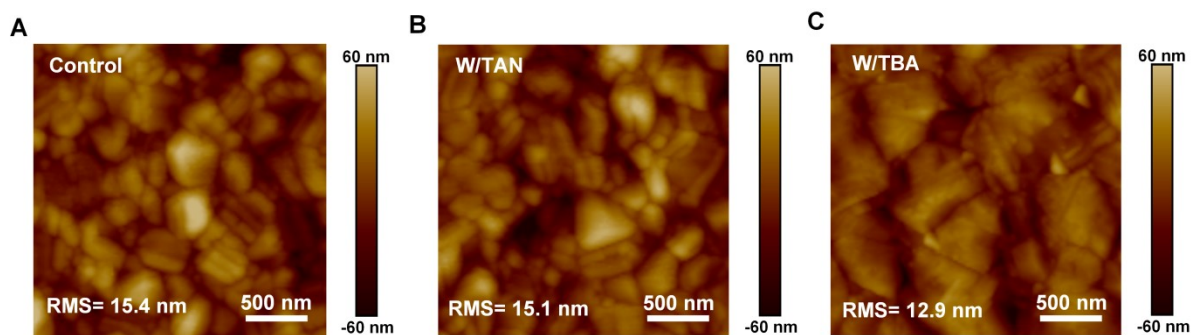

**Figure S10.** AFM images of (A) control, (B) TAN-modified, and (C) TBA-modified perovskite films.



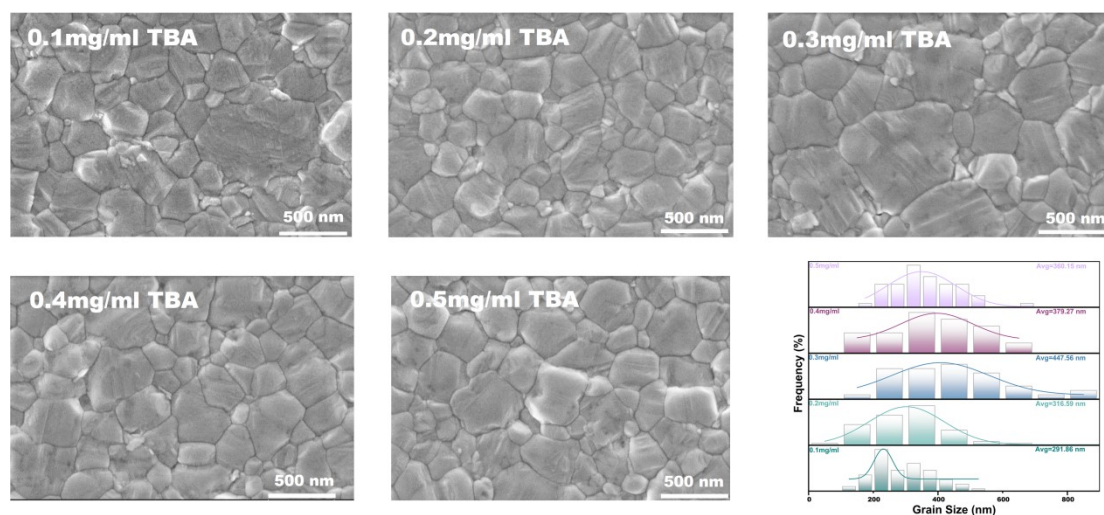

**Figure S11.** SEM images of perovskite films with different concentrations of TBA

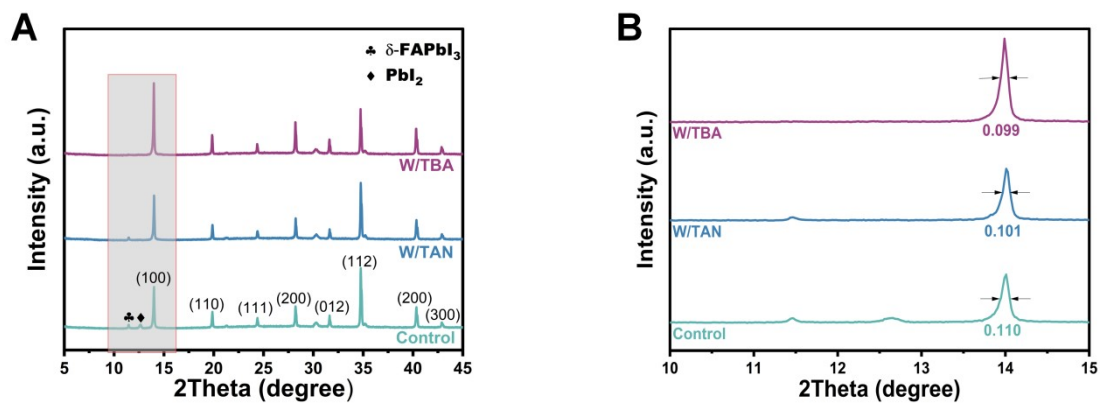

**Figure S12. XRD patterns of perovskite films.** (A) XRD patterns of Control, TAN- and TBA-modified perovskite films. (B) XRD patterns of the range of 10-15° and the corresponding FWHM of the perovskite films.

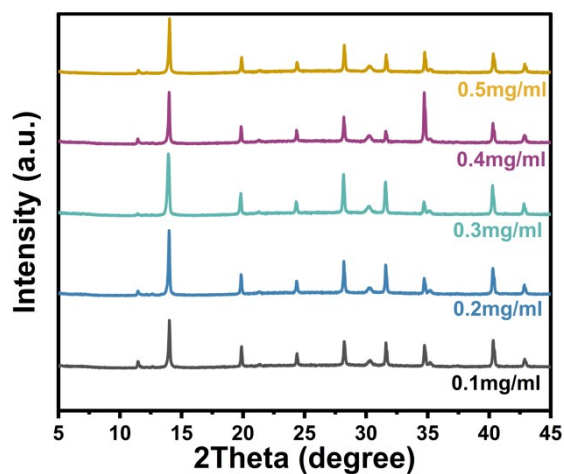

**Figure S13. XRD patterns of perovskite film with different concentrations of TBA.** The highest intensity of diffraction peak was observed for the perovskite films with 0.3 mg mL<sup>-1</sup> TBA, this result is consistent with the trend shown in SEM images, indicates that 0.3 mg mL<sup>-1</sup> is the most optimal addition amount.

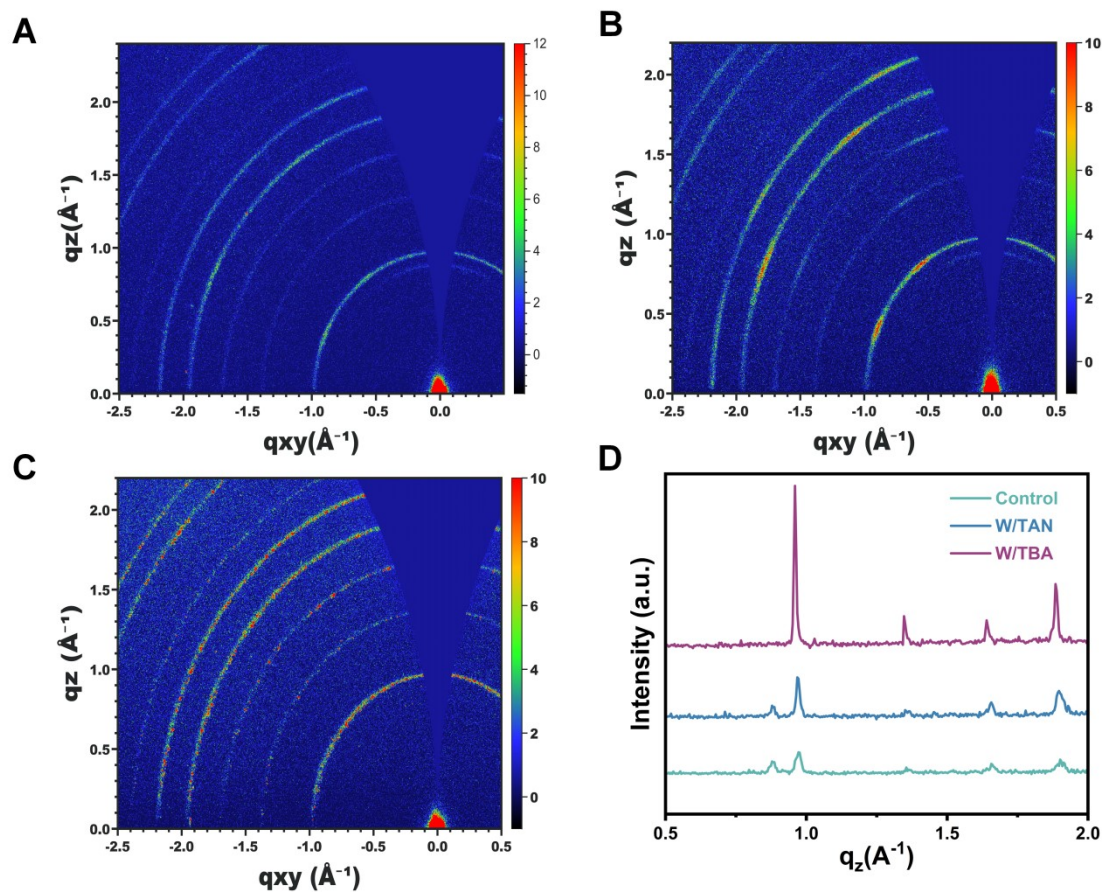

**Figure S14.** 2D-GIWAXS patterns of Control (A) TAN- (B) and TBA-treated (C) perovskite films. (D) The corresponding out-of-plane line cuts of GIWAXS patterns.

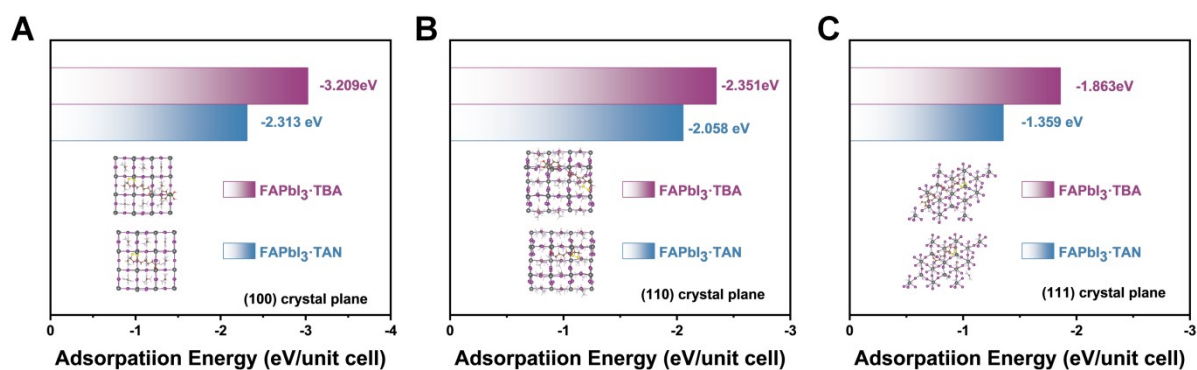

**Figure S15. Adsorption models and corresponding adsorption energies of TAN and TBA on different crystal planes of perovskite. (A) (100) crystal plane. (B) (110) crystal plane. (C) (111) crystal plane.**

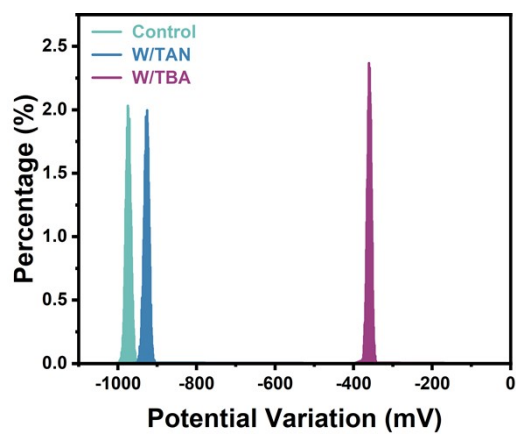

**Figure S16.** Surface potential variation of perovskite films.

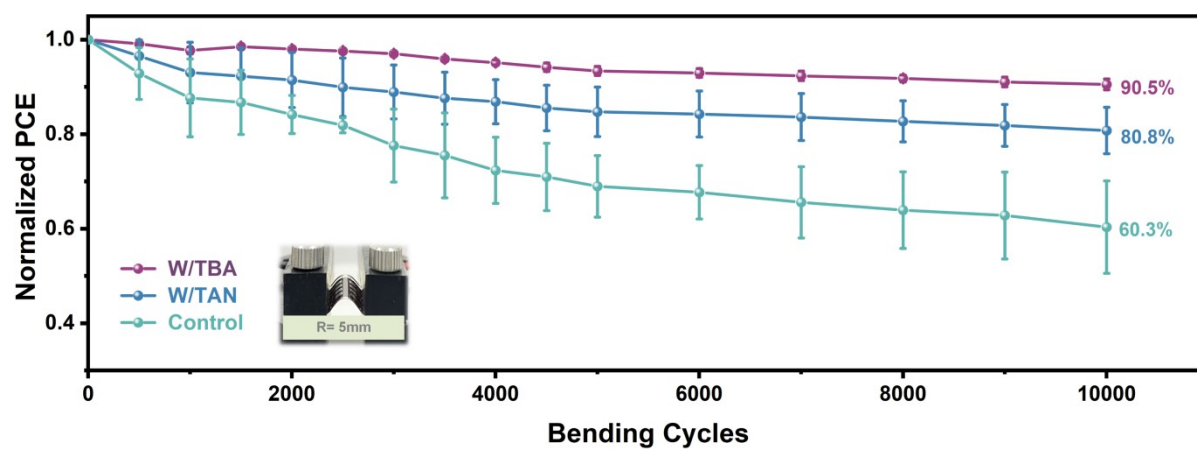

**Figure S17.** Mechanical stability of the f-PSCs versus bending cycles at a radius of 5 mm.

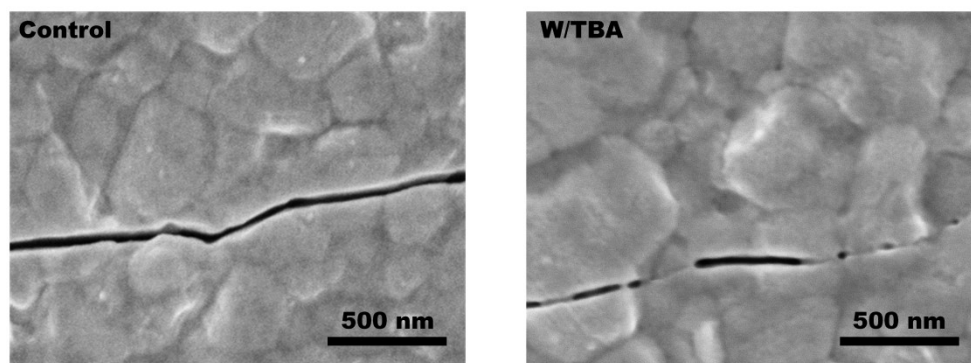

**Figure S18.** Top-view SEM images of the perovskite films after 10000 bending cycles.



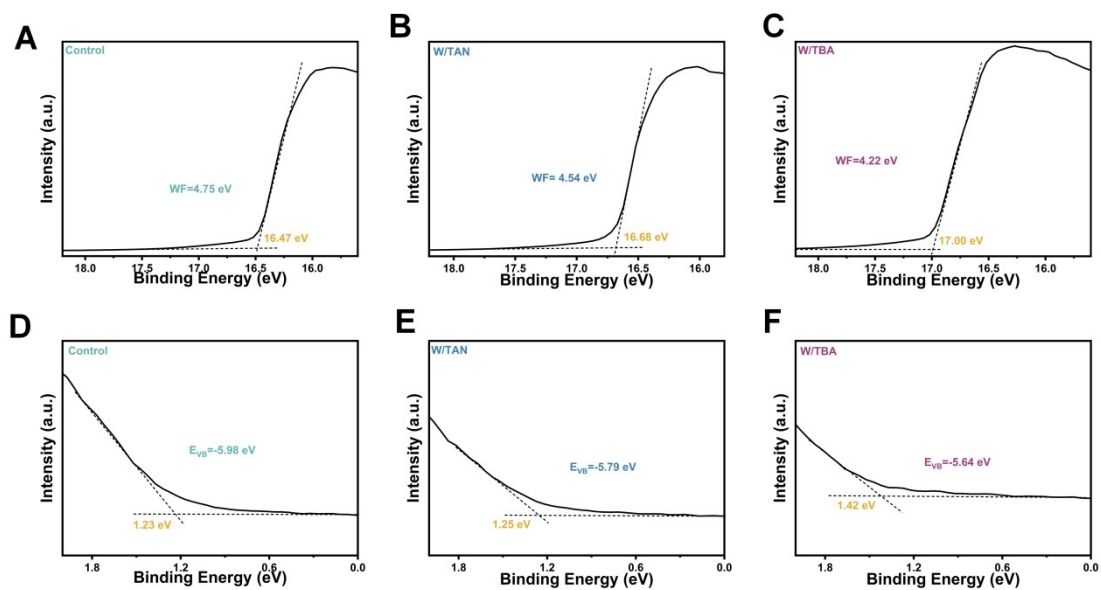

**Figure S19. UPS spectra of perovskite films.** (A-C) in the secondary-cutoff region. (D-F) in the valance band region.

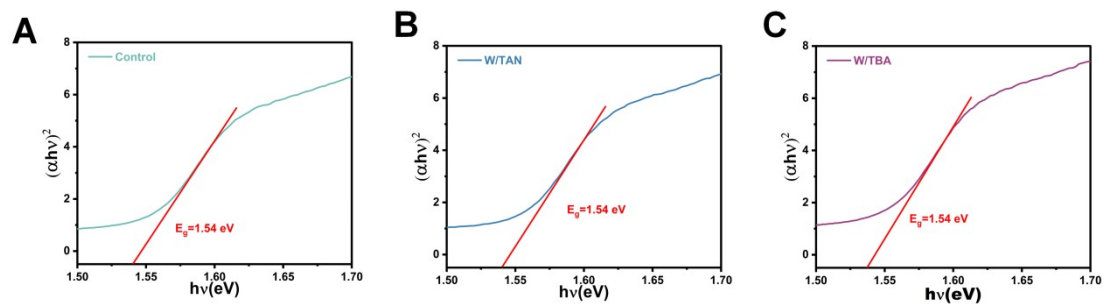

**Figure S20.** The UV-vis absorbance spectrum of the (A) Control, (B) TAN- and (C) TBA-treated perovskite films.

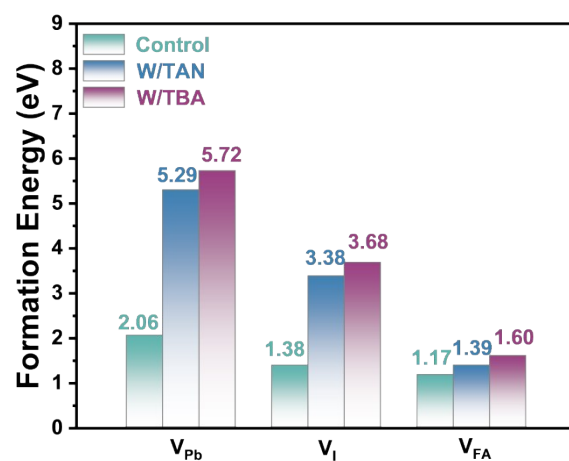

**Figure S21.** Calculated formation energy of different types defects.

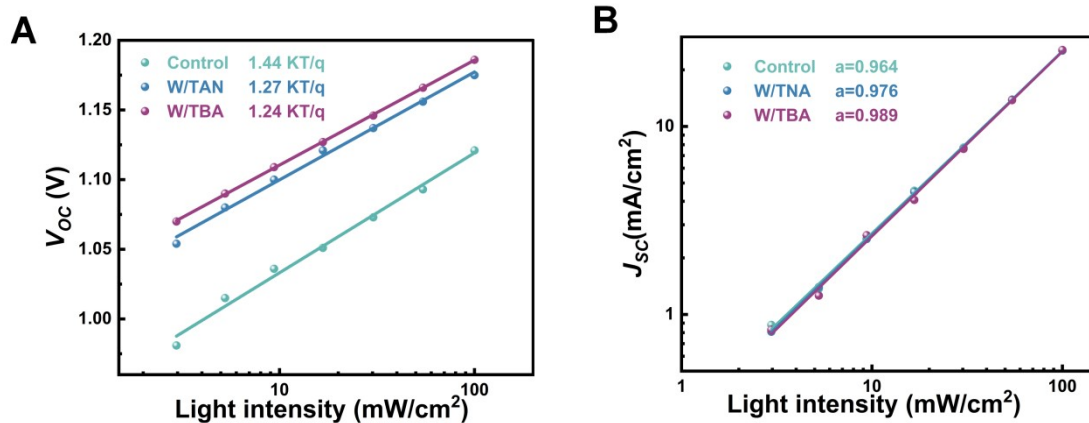

**Figure S22. The light intensity dependence of the devices.** (A)  $V_{oc}$  versus light intensity of the devices. (B)  $J_{sc}$  versus light intensity of the devices.

华南国家计量测试中心  
广东省计量科学研究院  
SOUTH CHINA NATIONAL CENTER OF METROLOGY  
GUANGDONG INSTITUTE OF METROLOGY

### 校准证书

CALIBRATION CERTIFICATE

证书编号 NYX202500691 第 1 页, 共 4 页  
Certificate No. Page of

客户名称 Ningbo Institute of Materials Technology & Engineering, CAS  
Name of the Customer  
联络信息 No. 1219, Zhongguan West Road, Zhenhai District, Ningbo City, Zhejiang Province, China  
Contact Information  
计量器具名称 Perovskite Solar Cell  
Description  
型号/规格 2.5cm×2.5cm  
Model/Type  
制造厂 Organic Optoelectronic Materials and Devices Group  
Manufacturer  
出厂编号 X-3-1 设备管理编号 —  
Serial No. Equipment No.  
接收日期 2025 年 11 月 13 日  
The date of receipt Y M D  
校准日期 2025 年 11 月 13 日  
The date of calibration Y M D  
发布日期 2025 年 11 月 17 日  
The date of issue Y M D

批准 周军红  
Reviewed by 周军红  
核 验 林森浩  
Reviewed by 林森浩  
校 准 梅书刚  
Calibrated by 梅书刚

校准地址: 中国广东省东莞市石塘岭东园大道新路段152号 邮政编码: 523443  
电话: +86(0) 86094172 移动电话: +86(0) 36611242 E-mail: scm@scm.com.cn  
Add: No.152, Shitangling Section, Dongguan Avenue, Shitang Town, Dongguan, Guangdong, China  
Post Code: 523443 Tel: +86(0) 86094172 Complaint Tel: +86(0) 36611242  
证书真伪查询: [www.scm.com.cn](http://www.scm.com.cn) [scm.scm.com.cn](http://scm.scm.com.cn) Certificate Authenticity Identity: [www.scm.com.cn](http://www.scm.com.cn) [scm.scm.com.cn](http://scm.scm.com.cn)

华南国家计量测试中心  
广东省计量科学研究院  
SOUTH CHINA NATIONAL CENTER OF METROLOGY  
GUANGDONG INSTITUTE OF METROLOGY

### 说明

证书编号 NYX202500691 第 2 页, 共 4 页  
Certificate No. Page of

**DIRECTIONS**

1. 本中心是国家市场监督管理总局在华南地区设立的国家法定计量检定机构, 本中心的质量管理体系符合 ISO/IEC 17025:2017 标准的要求。  
This laboratory is the National Legal Metrological Verification Institution in southern China set up by the State Administration for Market Regulation. The quality system is in accordance with ISO/IEC 17025:2017.

2. 校准地点:  
The location of calibration:  
东莞第二检测基地A1-402

3. 本次校准使用的方法:  
The method used:  
JJF2129-2024 钙钛矿太阳能电池校准规范, 光电性能参数 C.S. for Perovskite Solar Cells: Photoelectric Characteristic Parameters

4. 本证书中的校准结果可溯源至国际单位制 (SI) 单位和/或社会公用计量标准。本次校准使用以下计量标准器具:  
The calibration results are traceable to International System of Units (SI) units and/or measurement standards for public service. The measurement standards used:

| 名称           | 型号规格                        | 编号         | 证书号/溯源机构                     | 计量特性                                                                                             |
|--------------|-----------------------------|------------|------------------------------|--------------------------------------------------------------------------------------------------|
| Name         | Model/Type                  | Serial No. | Certificate No./Traceability | Metrological Characteristic                                                                      |
| ARET 稳态太阳模拟器 | SUNC000<br>/(300~1300) W/m² | 374        | NYX202400537<br>/本中心         | 光谱匹配度: A级<br>辐照度不均匀性: A级<br>辐照度不稳定性: A级                                                          |
| 标准源表         | 2420<br>/(0~60) V, (0~3) A  | 4051271    | DR0202503306<br>/本中心         | 电压: $U_{dc}=0.1\%$ , 电流: $I_{dc}=0.1\%$ (k=2)<br>DCV: $U_{dc}=0.1\%$ , DCA: $I_{dc}=0.1\%$ (k=2) |
| 测量显微镜        | 15JE<br>/(0~13) mm          | 023293     | CY202403302<br>/本中心          | $L'=0.9 \mu m$ (k=2)                                                                             |
| 标准电池         | VM6502<br>/(0.1~200) mV     | 200432     | GX2025-02029<br>/国家计量院       | 短路电流: $I_{sc}=1.8\%$ , k=2<br>Isr: $I_{sc}=1.8\%$ , k=2                                          |

注: 1. 本证书校准结果只与受校仪器有关。 The results relate only to the items calibrated.  
Note: 2. 未经本机构书面批准, 不得部分复制此证书。 This certificate shall not be reproduced except in full, without the written approval of our laboratory.  
3. “客户名称”、“联络信息”由客户提供, “制造厂”、“型号规格”、“出厂编号”以及“设备编号”为仪器上标注, 客户对上面内容如有异议, 请在收到证书后二十个工作日内提出。  
The information Name of the Customer and Contact Information are provided by customer, and the Manufacturer, Model/Type, Serial No. and Equipment No. are marked on the items. Customer shall submit any objection within 20 working days after receiving the certificate for the information above.

华南国家计量测试中心  
广东省计量科学研究院  
SOUTH CHINA NATIONAL CENTER OF METROLOGY  
GUANGDONG INSTITUTE OF METROLOGY

### 校准结果

RESULTS OF CALIBRATION

证书编号 NYX202500691 原始记录号 NYX202500691 第 3 页, 共 4 页  
Certificate No. Record No. Page of

1. 外观检查: 符合要求  
Apparent Inspect: Pass

2. 测试条件: 温度(25±2)℃; 辐照度1000W/m².  
Test conditions: Temperature: (25±2)℃; Irradiance: 1000W/m².

3. 电流-电压特性曲线和功率-电压特性曲线:  
I-V and P-V curves:

图1 电流-电压特性曲线和功率-电压特性曲线  
Figure 1 I-V and P-V characteristic curves

4. 光电性能参数(反扫以及正扫):  
Results of photoelectric properties (Reverse scan and forward scan):

| 正反扫             | 面积     | 短路电流密度 $J_{sc}$               | 短路电流 $I_{sc}$         | 开路电压 $V_{oc}$        | 填充因子 $FF$   | 最大功率 $P_m$    | 最佳工作电压 $V_{mp}$         | 最佳工作电流 $I_{mp}$         | 转换效率 $\eta$ |
|-----------------|--------|-------------------------------|-----------------------|----------------------|-------------|---------------|-------------------------|-------------------------|-------------|
| Reverse/Forward | Area   | Short circuit current density | Short circuit current | Open circuit voltage | Fill factor | Maximum power | Optimum working voltage | Optimum working current | Efficiency  |
|                 | cm²    | mA/cm²                        | mA                    | V                    | %           | mW            | V                       | mA                      | %           |
| Reverse         | 0.0475 | 26.31                         | 1.250                 | 1.183                | 84.89       | 1.255         | 1.206                   | 1.040                   | 26.41       |
| Forward         | 0.0475 | 26.22                         | 1.246                 | 1.174                | 84.80       | 1.240         | 1.192                   | 1.040                   | 26.10       |

华南国家计量测试中心  
广东省计量科学研究院  
SOUTH CHINA NATIONAL CENTER OF METROLOGY  
GUANGDONG INSTITUTE OF METROLOGY

### 校准结果

RESULTS OF CALIBRATION

证书编号 NYX202500691 原始记录号 NYX202500691 第 4 页, 共 4 页  
Certificate No. Record No. Page of

5. 被测样品信息:  
Sample information:

图2 Mask used during measurement and reverse side of the sample  
金属掩模孔光阑平均直径: 2.460 mm  
The average diameter of metal aperture mask:

图3 Reverse side of the sample

说明(Notes):  
1. 被测样品的光照面积基于对金属掩模孔光的测量。  
The effective illuminated area of the measured sample based on the measurement of metal aperture mask.  
2. 本次测量结果的扩展不确定度为: 开路电压  $V_{oc}$ :  $U_{oc}=1.2\%$ , 短路电流  $I_{sc}$ :  $U_{sc}=2.7\%$ , 最大功率  $P_m$ :  $U_{pm}=3.0\%$ , 转换效率  $\eta$ :  $U_{\eta}=3.4\%$ , (k=2).  
The expanded uncertainty of measuring results:  $V_{oc}$ :  $U_{oc}=1.2\%$ ,  $I_{sc}$ :  $U_{sc}=2.7\%$ ,  $P_m$ :  $U_{pm}=3.0\%$ ,  $\eta$ :  $U_{\eta}=3.4\%$ , (k=2).  
3. 校准活动中对测量结果有影响的条件: 温度(25±2)℃, 湿度(50±5)%RH.  
Conditions under which the calibrations were made that have an influence on the measurement results: Temperature: (25±2)℃, Humidity: (50±5)%RH.  
4. 本证书中给出的扩展不确定度依据JJF 1059.1-2012《测量不确定度评定与表示》评定, 由合成标准不确定度乘以包含概率约为95%时对应的包含因子k得到。  
The expanded uncertainty given in this certificate is evaluated according to JJF 1059.1-2012 'Evaluation and Expression of Uncertainty in Measurement' which is obtained by multiplying the combined standard uncertainty by the coverage factor k corresponding to the coverage probability of about 95%.  
5. 该证书的溯源日期为本证书的校准日期。由于复校时间间隔的长短是由仪器的使用情况、使用者、仪器本身质量等诸因素决定的, 因此, 送校单位可根据实际情况自主决定复校时间间隔, 更换重要部件、维修或对仪器性能有怀疑时, 应及时校核。  
The traceability date of this instrument is the 'Calibration Date' on this certificate. Since the calibration interval is determined by the use of the instrument, operation of the user, the quality of the instrument itself and other factors, the re-calibration date can be decided by the user according to the actual situation. In case of replacement of important parts, maintenance or doubt on the performance of the instrument, it shall be calibrated in time.

**Figure S23.** Independent efficiency certification of perovskite solar cells by an accredited institute of South China National Center of Metrology, giving a PCE of 26.41% of the champion device.

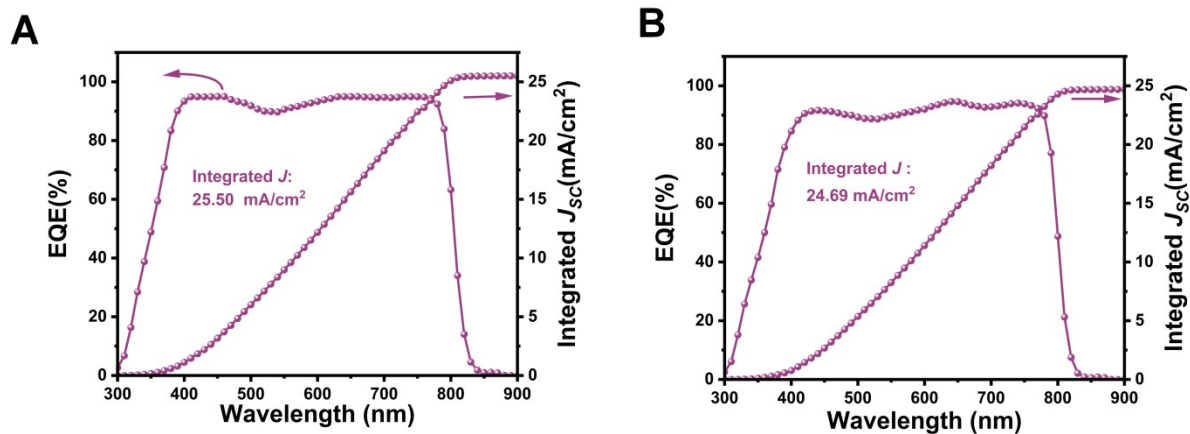

**Figure S24.** EQE spectra and corresponding integrated current density of rigid PSCs. (A) Rigid PSCs. (B) Flexible PSCs.

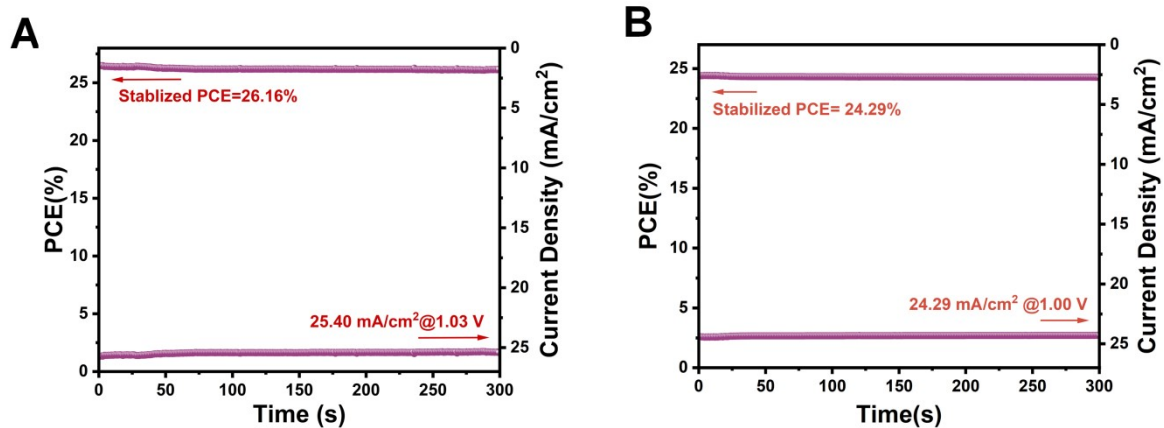

**Figure S25.** The stable power output and steady-state current density of the best-performance rigid device with TBA. (A) Rigid PSCs. (B) Flexible PSCs.

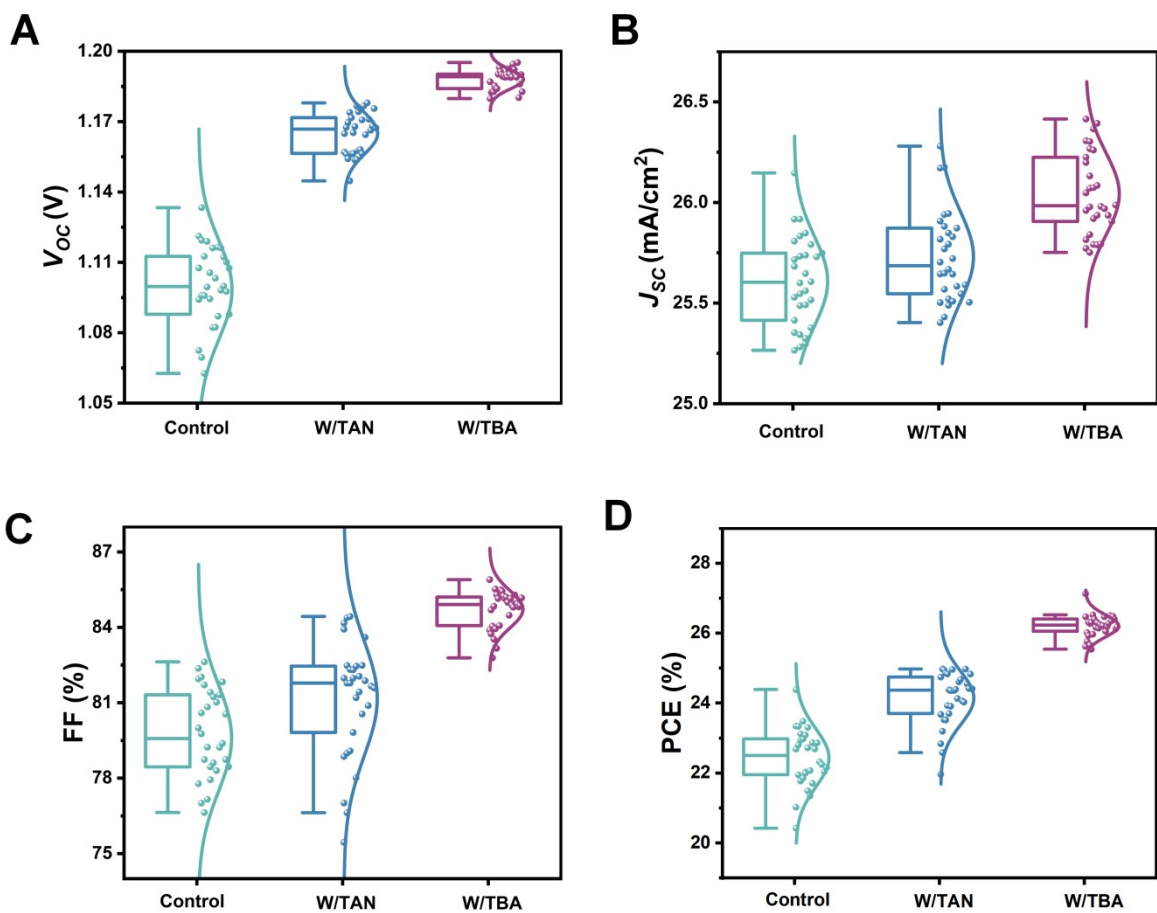

**Figure S26. Statistical distribution of photovoltaic parameters from 30 individual rigid devices.** (A)  $V_{oc}$  normal distribution. (B)  $J_{sc}$  normal distribution. (C) FF normal distribution. (D) PCE normal distribution.



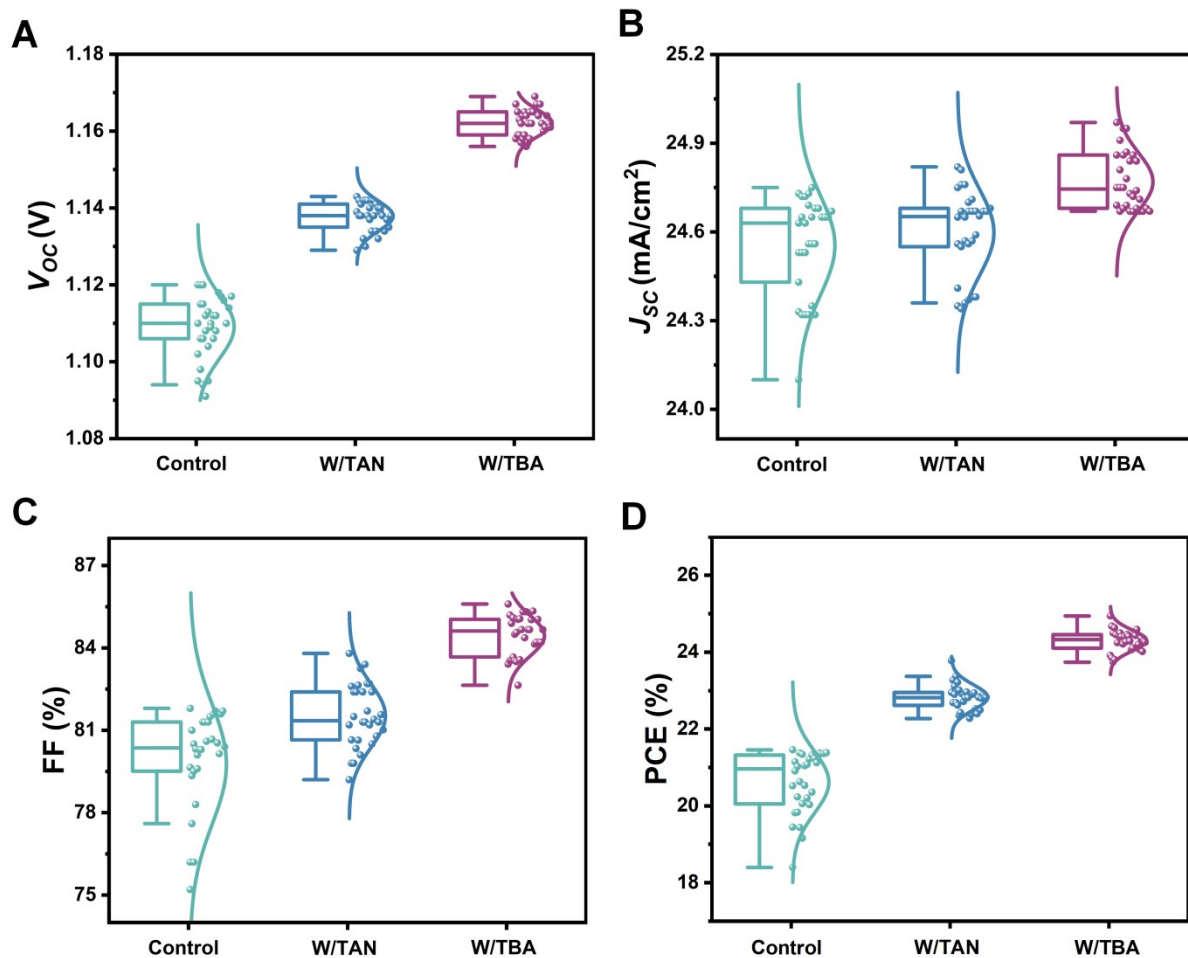

**Figure S27. Statistical distribution of photovoltaic parameters from 30 individual flexible devices.** (A)  $V_{oc}$  normal distribution. (B)  $J_{sc}$  normal distribution. (C) FF normal distribution. (D) PCE normal distribution.

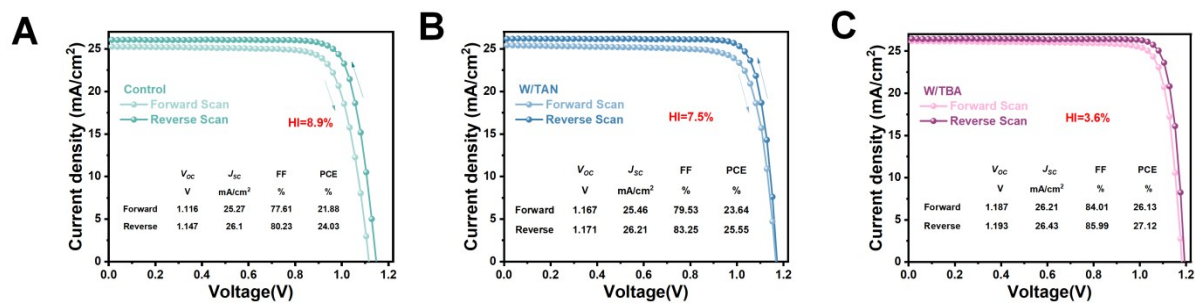

**Figure S28.**  $J$ - $V$  curves with forward and reverse scan for devices. (A) Control, (B) W/TAN, (C) W/TBA-treated PSCs.

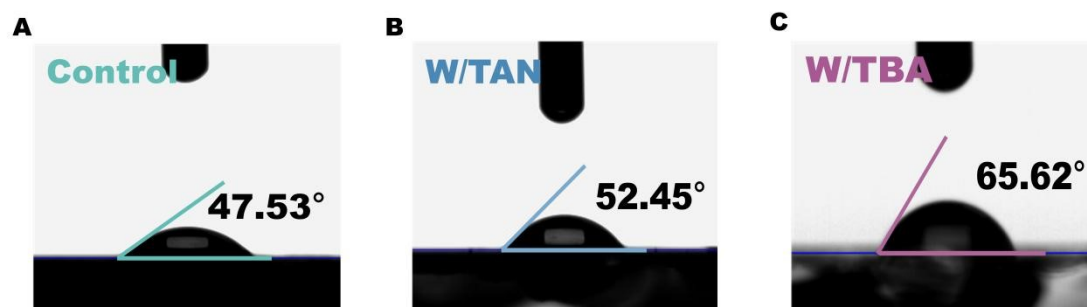

Figure S29. Water contact angles perovskite films.

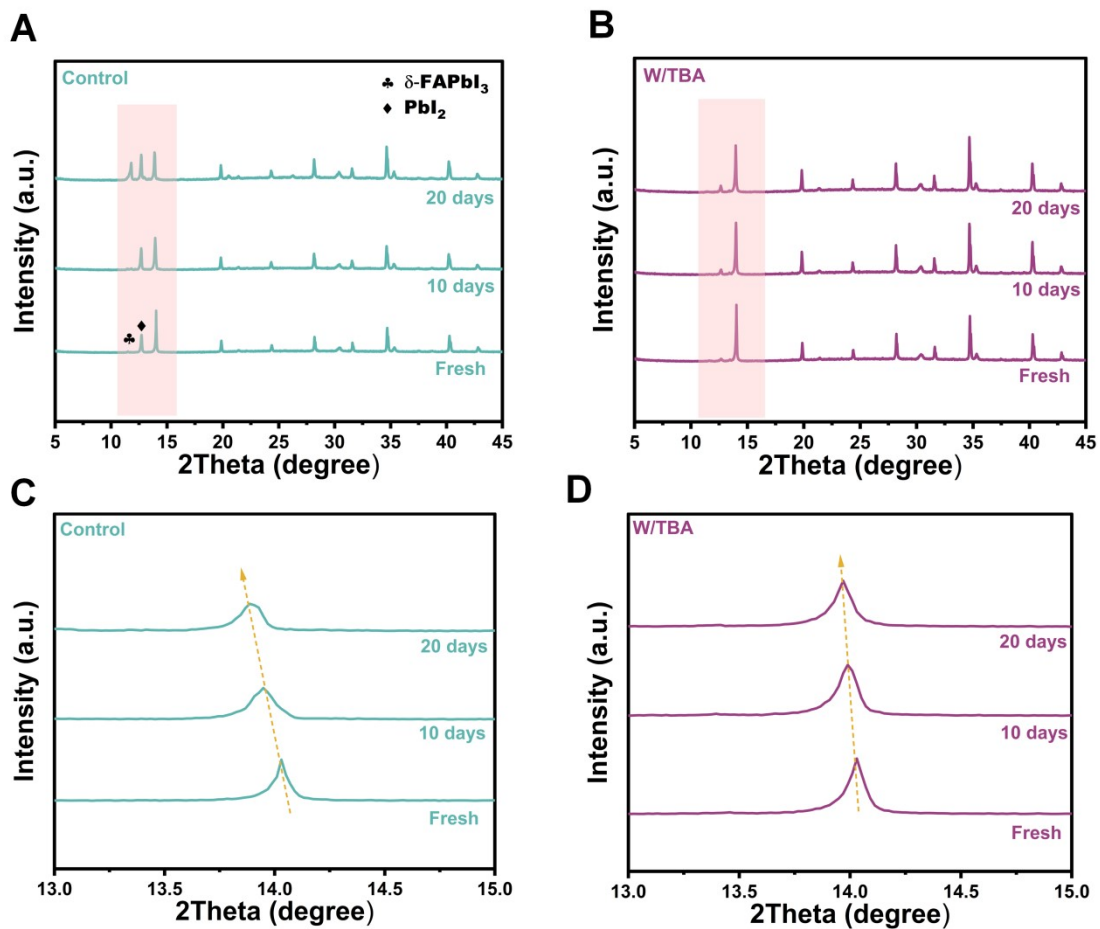

**Figure S30. XRD patterns of the perovskite films during the accelerated aging process (air, 1-sun, 50% RH). (A) Control sample. (B) W/TBA sample. The evolution of the  $\alpha$ -phase peak in the XRD spectra of perovskite film. (C) Control sample. (D) W/TBA sample**

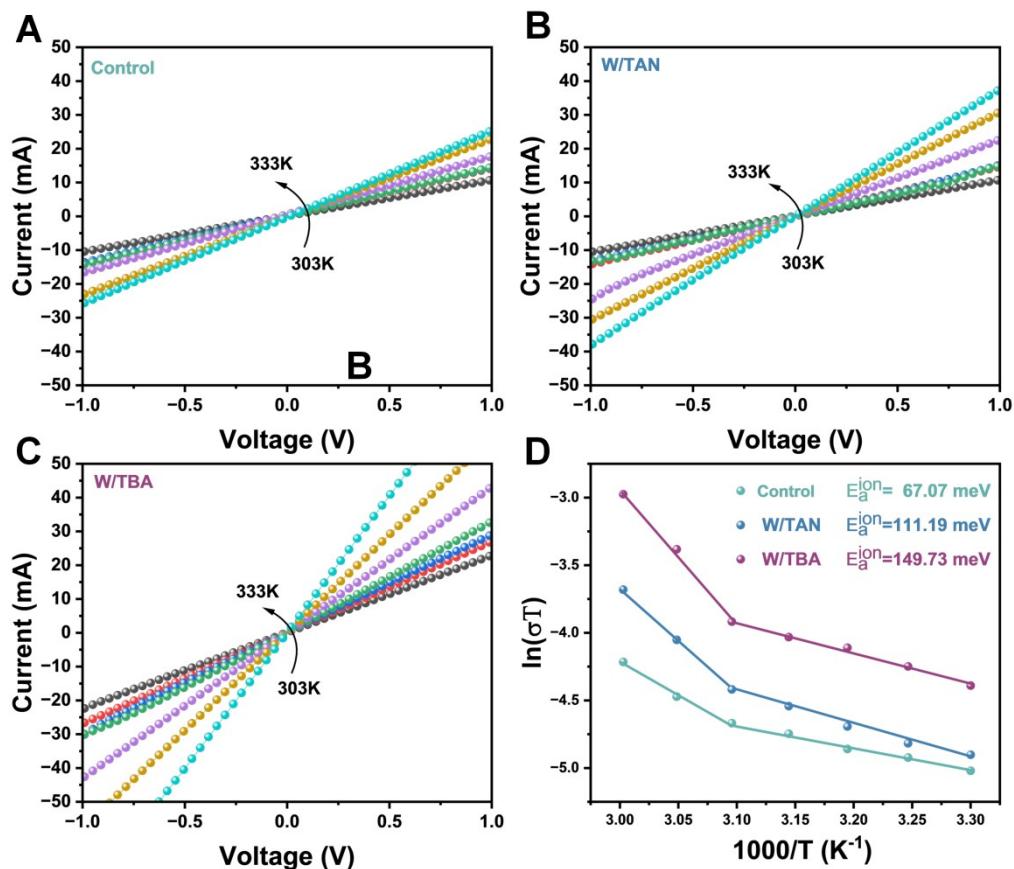

**Figure S31.** Temperature-dependent conductivity of the perovskite films (A) Control, (B) W/TAN, and (C) W/TBA. Devices of ITO/perovskite/Ag were used. (D) Ion migration activation energy of the perovskite films.

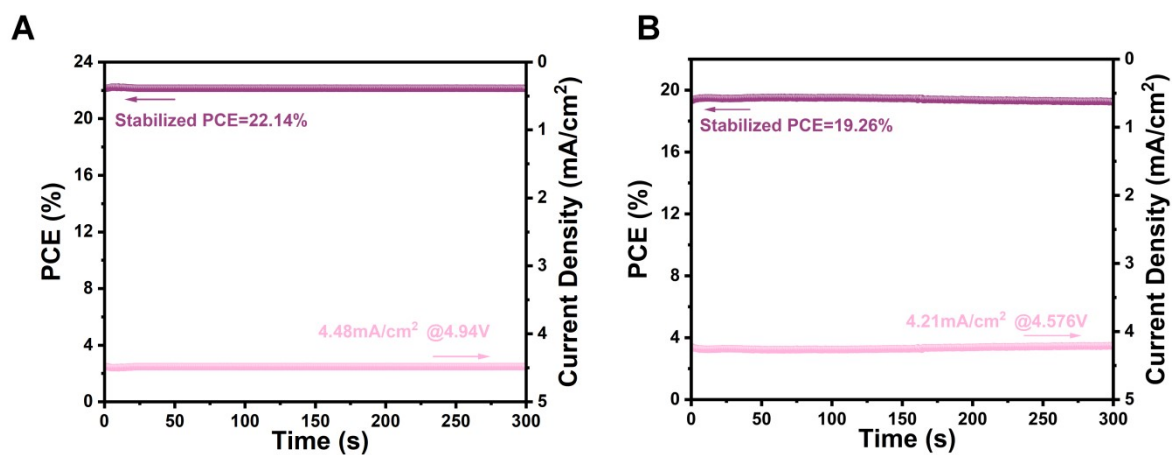

**Figure S32.** The stable power output and steady-state current density of the best-performance PSMs. (A) Rigid PSMs. (B) Flexible PSMs.

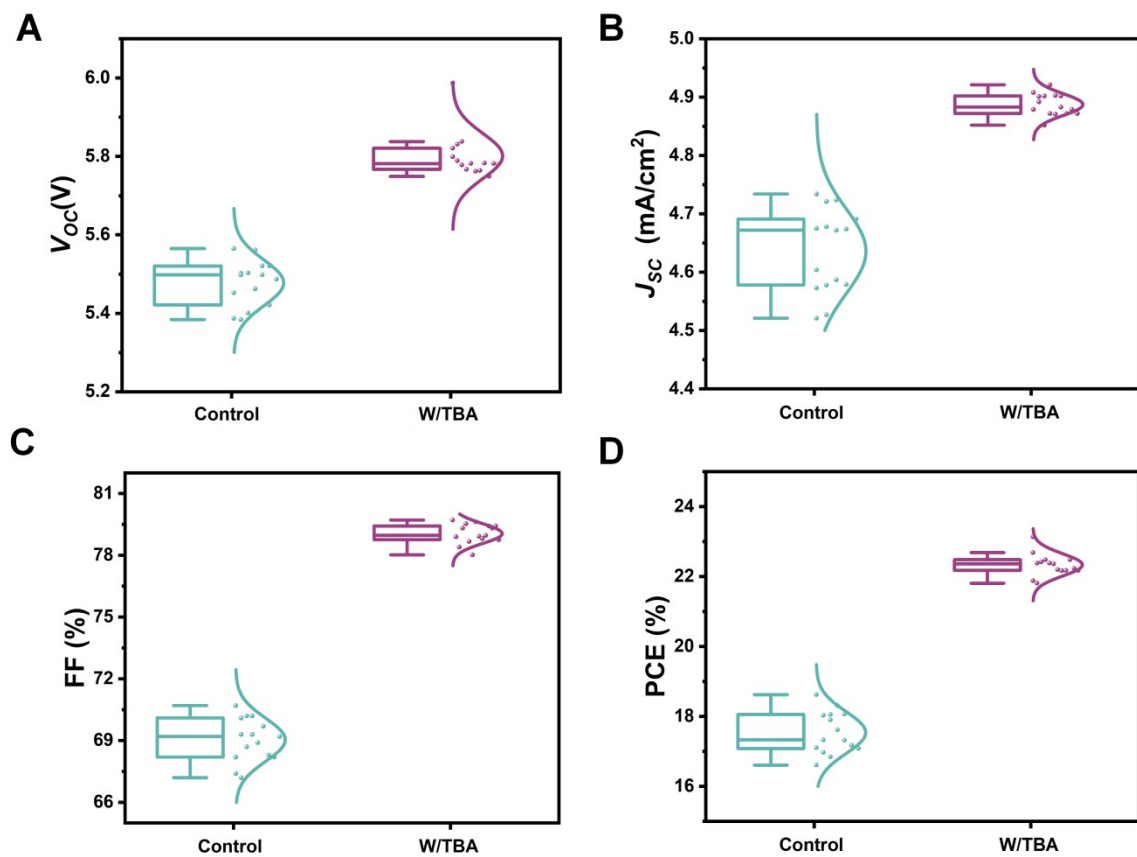

**Figure S33. Statistical comparison of control and target-based perovskite mini-module with aperture area 10.24 cm<sup>2</sup>** (the statistical results are obtained from 15 rigid mini-modules for each condition) (A)  $V_{oc}$  normal distribution. (B)  $J_{sc}$  normal distribution. (C) FF normal distribution. (D) PCE normal distribution.

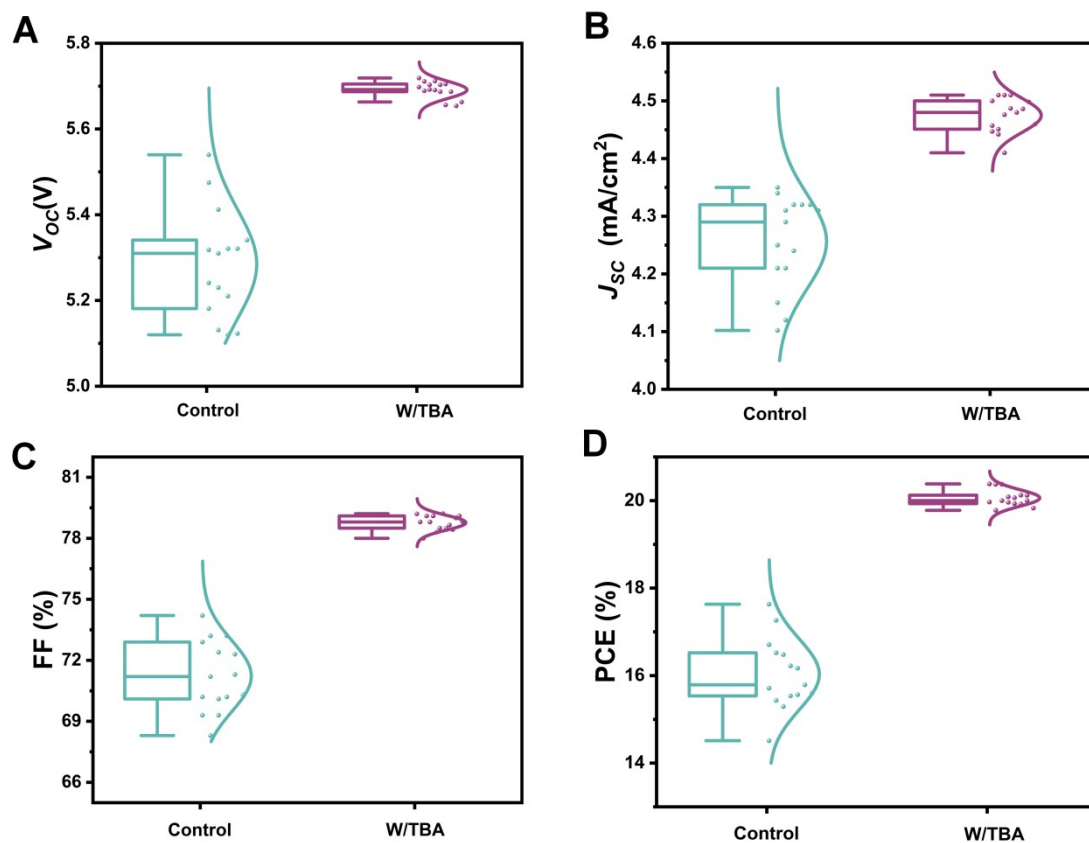

**Figure S34. Statistical comparison of control and target-based perovskite mini-module with aperture area 10.24 cm<sup>2</sup>** (the statistical results are obtained from 15 flexible mini-modules for each condition) (A)  $V_{oc}$  normal distribution. (B)  $J_{sc}$  normal distribution. (C) FF normal distribution. (D) PCE normal distribution.



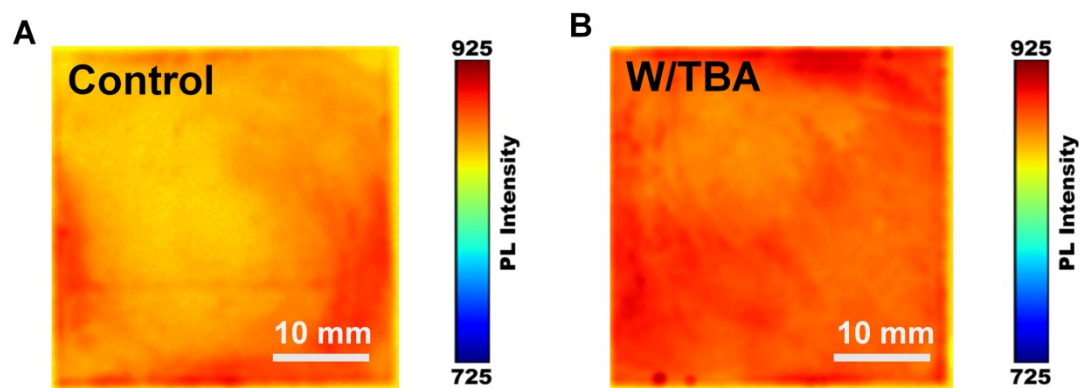

**Figure S35.** PL mapping images of perovskite films spin-coated on 50×50 mm<sup>2</sup> substrate.  
(A) Control, (B) W/TBA.

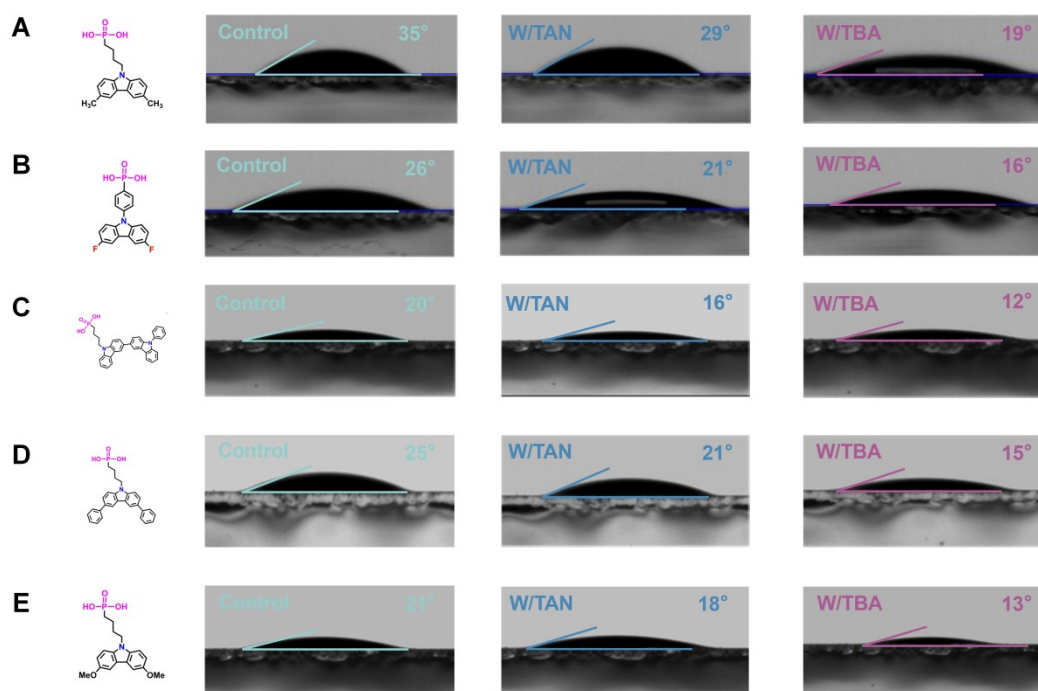

**Figure S36.** Contact angles of the perovskite precursor on the glass/ITO/SAM substrates. (A) Me-4PACz, (B) F-PhpPACz, (C) 4PABCz, (D) Ph-4PACz, (E) MeO-4PACz.

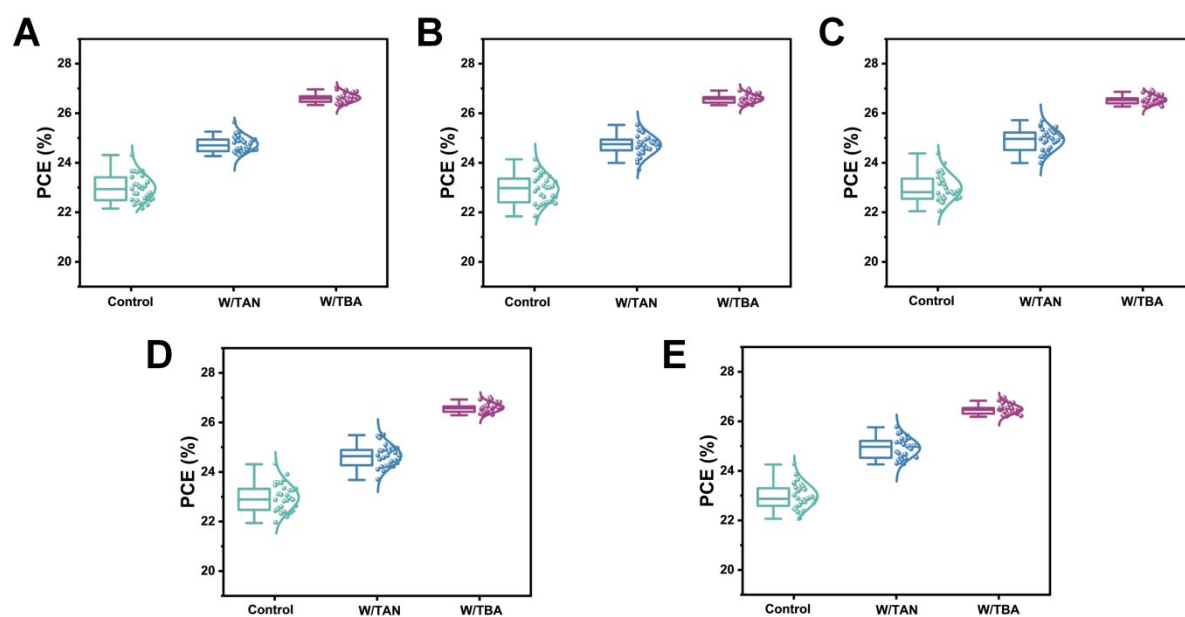

**Figure S37. Statistical Distribution of Photovoltaic Parameters of 30 Independent Rigid Devices on Different SAMs.** (A) Me-4PACz, (B) F-PhpPACz, (C) 4PABCz, (D) Ph-4PACz, (E) MeO-4PACz.

| Smample | $A_1$      | $\tau_1$    | $A_2$      | $\tau_2$    | $\tau_{ave}(ns)$ |
|---------|------------|-------------|------------|-------------|------------------|
| Control | 0.18       | 32.31       | 0.35       | 601.89      | 585.87           |
|         | $\pm 0.01$ | $\pm 2.03$  | $\pm 0.01$ | $\pm 3.42$  | $\pm 2.34$       |
| W/TAN   | 0.11       | 45.31       | 0.40       | 713.07      | 701.80           |
|         | $\pm 0.01$ | $\pm 4.25$  | $\pm 0.01$ | $\pm 4.41$  | $\pm 4.23$       |
| W/TBA   | 0.05       | 133.89      | 0.38       | 925.95      | 859.52           |
|         | $\pm 0.01$ | $\pm 37.99$ | $\pm 0.01$ | $\pm 19.62$ | $\pm 34.23$      |

**Table S1.** Fitting carrier lifetimes of perovskite films determined by TRPL.

**Table S2.**  $R_1$  and  $R_2$  values from electrochemical impedance spectroscopy (EIS) data of the control, TAN-treated, and TBA-treated devices.

| Sample  | $R_1(\Omega)$ | $R_2(\Omega)$ |
|---------|---------------|---------------|
| Control | 43.52         | 1169          |
| W/TAN   | 41.32         | 3290          |
| W/TBA   | 23.54         | 5000          |

**Table S3.** Results derived from electronic-only SCLC.

| Sample  | $V_{TFL}$ (V) | $N_t$ (cm <sup>-3</sup> ) |
|---------|---------------|---------------------------|
| Control | 0.75          | $1.11 \times 10^{16}$     |
| W/TAN   | 0.69          | $1.02 \times 10^{16}$     |
| W/TBA   | 0.53          | $7.88 \times 10^{15}$     |

**Table S4.** The dependence of  $V_{oc}$  and  $J_{sc}$  of the PSCs on light intensity.

| Sample  | $nkT/q$  | $\alpha$ |
|---------|----------|----------|
| Control | 1.44kT/q | 0.964    |
| W/TAN   | 1.27kT/q | 0.976    |
| W/TBA   | 1.24kT/q | 0.989    |

**Table S5.** Statistics of photovoltaic parameters for 30 individual perovskite solar cells (PSCs)

| Sample  | $V_{oc}$ (V) | $J_{sc}$ (mA/cm <sup>2</sup> ) | FF (%)     | PCE (%)    |
|---------|--------------|--------------------------------|------------|------------|
| Control | 1.099±0.034  | 25.36±0.028                    | 79.60±3.04 | 22.17±1.29 |
| W/TAN   | 1.170±0.080  | 25.52±0.025                    | 81.80±2.66 | 24.07±1.01 |
| W/TBA   | 1.183±0.057  | 25.67±0.022                    | 84.91±1.04 | 26.43±0.69 |



**Table S6.** Statistics of photovoltaic parameters for 30 individual flexible PSCs.

| Sample  | $V_{oc}$ (V) | $J_{sc}$ (mA/cm <sup>2</sup> ) | FF (%)     | PCE (%)    |
|---------|--------------|--------------------------------|------------|------------|
| Control | 1.083±0.034  | 24.36±0.028                    | 77.54±2.78 | 21.47±1.19 |
| W/TAN   | 1.132±0.080  | 24.47±0.025                    | 80.61±2.66 | 22.71±1.07 |
| W/TBA   | 1.163±0.057  | 24.67±0.022                    | 84.91±1.04 | 24.03±0.92 |

**Table S7.** Detailed photovoltaic parameters for the best performing rigid PSCs.

|         | Scanning | $V_{oc}$ (V) | $J_{sc}$ (mA/cm <sup>2</sup> ) | FF (%) | PCE (%) | HI (%) |
|---------|----------|--------------|--------------------------------|--------|---------|--------|
| Control | Reverse  | 1.147        | 26.1                           | 80.23  | 24.03   | 8.9    |
|         | Forward  | 1.116        | 25.27                          | 77.60  | 21.88   |        |
| W/TAN   | Reverse  | 1.174        | 26.21                          | 83.25  | 25.55   | 7.5    |
|         | Forward  | 1.167        | 25.46                          | 79.53  | 23.64   |        |
| W/TBA   | Reverse  | 1.192        | 26.43                          | 85.99  | 27.12   | 3.6    |
|         | Forward  | 1.187        | 26.21                          | 84.01  | 26.13   |        |

**Table S8.** Summary of photovoltaic parameters of reported high-performance inverted PSMs up to now (active areas are 10-100 cm<sup>2</sup>)

| Device Architecture                                                                         | $V_{oc}$<br>(V) | $J_{sc}$<br>(mA/cm <sup>2</sup> ) | FF<br>(%)   | PCE<br>(%)   | Area<br>(cm <sup>2</sup> ) | Ref.             |
|---------------------------------------------------------------------------------------------|-----------------|-----------------------------------|-------------|--------------|----------------------------|------------------|
| <b>Glass/ITO/SAM/Perovskite/C<sub>60</sub>/BCP/Ag</b>                                       | <b>5.987</b>    | <b>4.86</b>                       | <b>79.4</b> | <b>23.10</b> | <b>10.24</b>               | <b>This work</b> |
| Glass/ITO/SAM/Perovskite/C <sub>60</sub> /BCP/Ag                                            | 5.686           | 4.85                              | 79.48       | 21.92        | 10.24                      | 1                |
| Glass/FTO/NiOx/Al <sub>2</sub> O <sub>3</sub> /SAM/Perovskite/C <sub>60</sub> /BCP/Cr/Bi/Cu | 5.82            | 4.78                              | 81.46       | 22.66        | 11.09                      | 2                |
| Glass/FTO/NiO/SAM/Perovskite/PCBM/BCP/Cu                                                    | 5.799           | 4.83                              | 78.99       | 22.08        | 11.1                       | 3                |
| Glass/ITO/Me-4PACz/Perovskite/LiF/C <sub>60</sub> /SnOx/Cu                                  | 8.35            | 3.06                              | 66.87       | 17.13        | 12.7                       | 4                |
| Glass/ITO/SAM/Perovskite/LiF/C <sub>60</sub> /SnO <sub>2</sub> /Cu                          | -               | -                                 | 66.80       | 17.10        | 12.70                      | 5                |
| glass/FTO/Ph-4PACz/Perovskite/C <sub>60</sub> /BCP/Ag                                       | 7.08            | 4.09                              | 74.96       | 21.72        | 16                         | 6                |
| Glass/ITO/SA-BPP/Perovskite/PCBM/C <sub>60</sub> /BCP/Ag                                    | 2.87            | 7.59                              | 77.51       | 17.08        | 22.4                       | 7                |
| Glass/ITO/NiOx/Me-4PACz/Perovskite/C <sub>60</sub> /BCP/Cu                                  | 12.83           | 2.15                              | 71.84       | 19.83        | 40.1                       | 2                |
| Glass/ITO/PTAA/Perovskite/C <sub>60</sub> /BCP/Cu                                           | 23.40           | 1.073                             | 80.1        | 20.11        | 78                         | 8                |

**Table S9.** Summary of photovoltaic parameters of reported high-performance inverted f-PSMs up to now (active areas are 5-100 cm<sup>2</sup>)

| Device Architecture                                               | $V_{oc}$<br>(V) | $J_{sc}$<br>(mA/cm <sup>2</sup> ) | FF<br>(%)   | PCE<br>(%)   | Area<br>(cm <sup>2</sup> ) | Ref.                 |
|-------------------------------------------------------------------|-----------------|-----------------------------------|-------------|--------------|----------------------------|----------------------|
| <b>PEN/ITO/SAM/Perovskite/C<sub>60</sub>/B<br/>CP/Ag</b>          | <b>5.719</b>    | <b>4.50</b>                       | <b>79.2</b> | <b>20.38</b> | <b>10.24</b>               | <b>This<br/>work</b> |
| PET/ITO/PTAA/Perovskite/C <sub>60</sub> /B<br>CP/Cu               | -               | -                                 | -           | 20.10        | 9.00                       | <sup>9</sup>         |
| PET/ITO/PTAA/Perovskite/C <sub>60</sub> /B<br>CP/Cu               | -               | -                                 | -           | 18.7         | 21.00                      | <sup>9</sup>         |
| PET/ITO/PTAA/Perovskite/C <sub>60</sub> /B<br>CP/Cu               | -               | -                                 | -           | 17.8         | 32.40                      | <sup>9</sup>         |
| PEN/ITO/Bio-<br>IL/Perovskite/PCBM/BCP/Ag                         | 5.39            | 4.52                              | 69.26       | 16.87        | 14.63                      | <sup>10</sup>        |
| PEN/ITO/SAM/Perovskite/2D-<br>passivation/C <sub>60</sub> /BCP/Ag | 8.123           | 3.17                              | 75.57       | 19.51        | 20.48                      | <sup>11</sup>        |
| MgF <sub>2</sub> /Willow                                          |                 |                                   |             |              |                            |                      |
| PEN/ITO/PTAA/Perovskite/C <sub>60</sub> /B<br>CP/Cu               | 13.142          | 1.64                              | 73.5        | 15.86        | 42.90                      | <sup>12</sup>        |
| PEN/ITO/SAM/Perovskite/C <sub>60</sub> /BC<br>P/Ag                | 5.584           | 4.40                              | 69.7        | 17.13        | 10.24                      | <sup>13</sup>        |

**Table S10.** Statistics of photovoltaic parameters for 15 individual perovskite solar modules (PSMs)

| Sample  | $V_{oc}$ (V) | $J_{sc}$ (mA/cm <sup>2</sup> ) | FF (%)     | PCE (%)    |
|---------|--------------|--------------------------------|------------|------------|
| Control | 5.56±0.107   | 4.64±0.180                     | 71.09±4.61 | 17.59±2.95 |
| W/TBA   | 5.76±0.037   | 4.89±0.031                     | 78.91±0.75 | 22.66±0.44 |

**Table S11.** Statistics of photovoltaic parameters for 15 individual flexible perovskite solar modules (f-PSMs)

| Sample  | $V_{oc}$ (V) | $J_{sc}$ (mA/cm <sup>2</sup> ) | FF (%)      | PCE (%)    |
|---------|--------------|--------------------------------|-------------|------------|
| Control | 5.20±0.275   | 4.14±0.2                       | 70.09±4.11  | 16.59±1.04 |
| W/TBA   | 5.61±0.109   | 4.41±0.09                      | 77.91±1.299 | 19.75±0.63 |

## Reference

- 1 S. Du, X. Tong, W. Zhang, X. Yan, Y. Zhou, J. Ge, Y. Luan, H. Guan, M. Yang, H. Liang, L. Xie and Z. Ge, *Adv. Energy Mater.*, 2025, e03781.
- 2 W. Liu, R. Chen, Z. Tan, J. Wang, S. Liu, C. Shi, X. Liu, Y. Cai, F. Ren, Z. Zhou, Q. Zhou, W. Li, T. Miao, H. Zhu, T. Imran, Z. Liu and W. Chen, *Adv. Energy Mater.*, 2025, **15**, 2404374.
- 3 Z. Tan, W. Liu, R. Chen, S. Liu, Q. Zhou, J. Wang, F. Ren, Y. Cai, C. Shi, X. Liu, Z. Zhou, H. Zhu, T. Miao, W. Li, M. Wang, Z. Liu and W. Chen, *Adv. Funct. Mater.*, 2025, **35**, 2419133.
- 4 J. Li, J. Dagar, O. Shargaieva, O. Maus, M. Remec, Q. Emery, M. Khenkin, C. Ulbrich, F. Akhundova, J. A. Márquez, T. Unold, M. Fenske, C. Schultz, B. Stegemann, A. Al-Ashouri, S. Albrecht, A. T. Esteves, L. Korte, H. Köbler, A. Abate, D. M. Többens, I. Zizak, E. J. W. List-Kratochvil, R. Schlattmann and E. Unger, *Adv. Energy Mater.*, 2023, **13**, 2203898.
- 5 H. Hu, D. B. Ritzer, A. Diercks, Y. Li, R. Singh, P. Fassel, Q. Jin, F. Schackmar, U. W. Paetzold and B. A. Nejdand, *Joule*, 2023, **7**, 1574–1592.
- 6 Z. Zhu, B. Ke, K. Sun, C. Jin, Z. Song, R. Jiang, J. Li, S. Kong, C. Liu, S. Bai, S. He, Z. Ge, F. Huang, Y.-B. Cheng and T. Bu, *Energy Environ. Sci.*, 2025, **18**, 4120–4129.
- 7 T. Wu, X. Xu, L. K. Ono, T. Guo, S. Mariotti, C. Ding, S. Yuan, C. Zhang, J. Zhang, K. Mitrofanov, Q. Zhang, S. Raj, X. Liu, H. Segawa, P. Ji, T. Li, R. Kabe, L. Han, A. Narita and Y. Qi, *Adv. Mater.*, 2023, **35**, 2300169.
- 8 M. A. Uddin, P. J. S. Rana, Z. Ni, G. Yang, M. Li, M. Wang, H. Gu, H. Zhang, B. D. Dou and J. Huang, *Nat. Commun.*, 2024, **15**, 1355.
- 9 W. Xu, B. Chen, Z. Zhang, Y. Liu, Y. Xian, X. Wang, Z. Shi, H. Gu, C. Fei, N. Li, M. A. Uddin, H. Zhang, L. Dou, Y. Yan and J. Huang, *Nat. Photonics*, 2024, **18**, 379–387.
- 10 B. Fan, J. Xiong, Y. Zhang, C. Gong, F. Li, X. Meng, X. Hu, Z. Yuan, F. Wang and Y. Chen, *Adv. Mater.*, 2022, **34**, 2201840.
- 11 D. Gao, B. Li, Z. Li, X. Wu, S. Zhang, D. Zhao, X. Jiang, C. Zhang, Y. Wang, Z. Li, N. Li, S. Xiao, W. C. H. Choy, A. K. -Y. Jen, S. Yang and Z. Zhu, *Adv. Mater.*, 2023, **35**, 2206387.
- 12 X. Dai, Y. Deng, C. H. Van Brackel, S. Chen, P. N. Rudd, X. Xiao, Y. Lin, B. Chen and J. Huang, *Adv. Energy Mater.*, 2020, **10**, 1903108.
- 13 W. Zhang, J. Liu, W. Song, J. Shan, H. Guan, J. Zhou, Y. Meng, X. Tong, J. Zhu, M. Yang and Z. Ge, *Sci. Adv.*, 2025, **11**, eadr2290.
